# Supplementary material for: Cav2.2 and Cav3.1 calcium channel inhibitors from Valeriana jatamansi Jones
Source: Royal Society of Chemistry journal article supplement (doi:10.1039/c7ra07327e), 2017-01-01
Supplement: c7ra07327e1.pdf [file c7ra07327e1.pdf]

## **Cav2.2 and Cav3.1 Calcium Channel Inhibitors from *Valeriana jatamansi* Jones**

He-Hai Jiang,<sup>a,c,†</sup> Fa-Wu Dong,<sup>b,d,†</sup> Jun Zhou,<sup>b</sup> Jiang-Miao Hu,<sup>b,\*</sup> Jian-Yang,<sup>a,\*</sup> Yin Nian<sup>a,\*</sup>

<sup>a</sup>Key Laboratory of Bioactive Peptides of Yunnan Province/Key Laboratory of Animal Models and Human Disease Mechanisms of Chinese Academy of Sciences, and Ion Channel Research and Drug Development Center, Kunming Institute of Zoology, Chinese Academy of Sciences, Kunming 650223, P. R. China.

<sup>b</sup>State Key Laboratory of Phytochemistry and Plant Resources in West China, Kunming Institute of Botany, Chinese Academy of Sciences, Kunming 650201, People's Republic of China.

<sup>c</sup>Faculty of Life Science and Technology, Kunming University of Science and Technology, Kunming, 650504, People's Republic of China.

<sup>d</sup>Faculty of Pharmacy, Yunnan University of Traditional Chinese Medicine, Kunming 650500, People's Republic of China.

## Supporting Information List

Page 1, The structures of compounds **14** and **15**.

Page 4-9, 1D and 2D NMR, ESIMS, HRESIMS, IR, UV and  $[\alpha]_D$  spectra of compound **1**.

Page 10-15, 1D and 2D NMR, ESIMS, HRESIMS, IR, UV and  $[\alpha]_D$  spectra of compound **2**.

Page 16-21, 1D and 2D NMR, ESIMS, HRESIMS, IR, UV and  $[\alpha]_D$  spectra of compound **3**.

Page 22, Dose-related effects of compounds **1**, **6**, **7**, **11**, and **12** on peak currents of  $Ca_v2.2$ .

Page 23, Inhibitory effects of compounds **1-12** on  $Ca_v2.2$  at  $30 \mu\text{M}$ .

Page 24, Inhibitory effects of compounds **1**, **4**, **5**, **6**, **7**, **9**, **10**, **11**, and **12** on  $Ca_v3.1$  at  $30 \mu\text{M}$ .

Page 25, Normalized current-voltage (I-V) curves of  $Ca_v1.2$  in the absence or presence of compounds **1-13**.

Page 26, Normalized current-voltage (I-V) curves of  $Ca_v2.1$  in the absence or presence of compounds **1-13**.

Page 27, Normalized current-voltage (I-V) curves of  $Ca_v2.2$  in the absence or presence of compounds **1-13**.

Page 28, Normalized current-voltage (I-V) curves of  $Ca_v3.1$  in the absence or presence of compounds **1-13**.

Page 29, Normalized current-voltage (I-V) curves of KNCH2 in the absence or presence of compounds **1-13**.

Page 30, The inhibitory effects of Mibefradil (the commercial T-type calcium channel inhibitor) and  $\omega$ -Conotoxin MVIIA (the commercial N-type calcium channel inhibitor) on  $Ca_v3.1$  and  $Ca_v2.2$ , respectively.

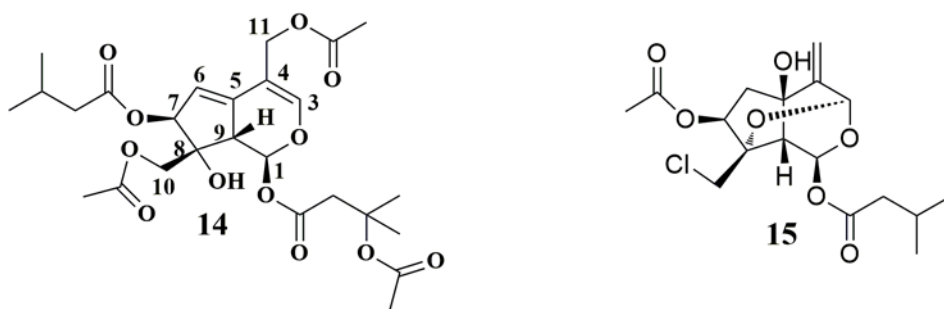

**Figure S1** Structures of compounds **14** and **15**

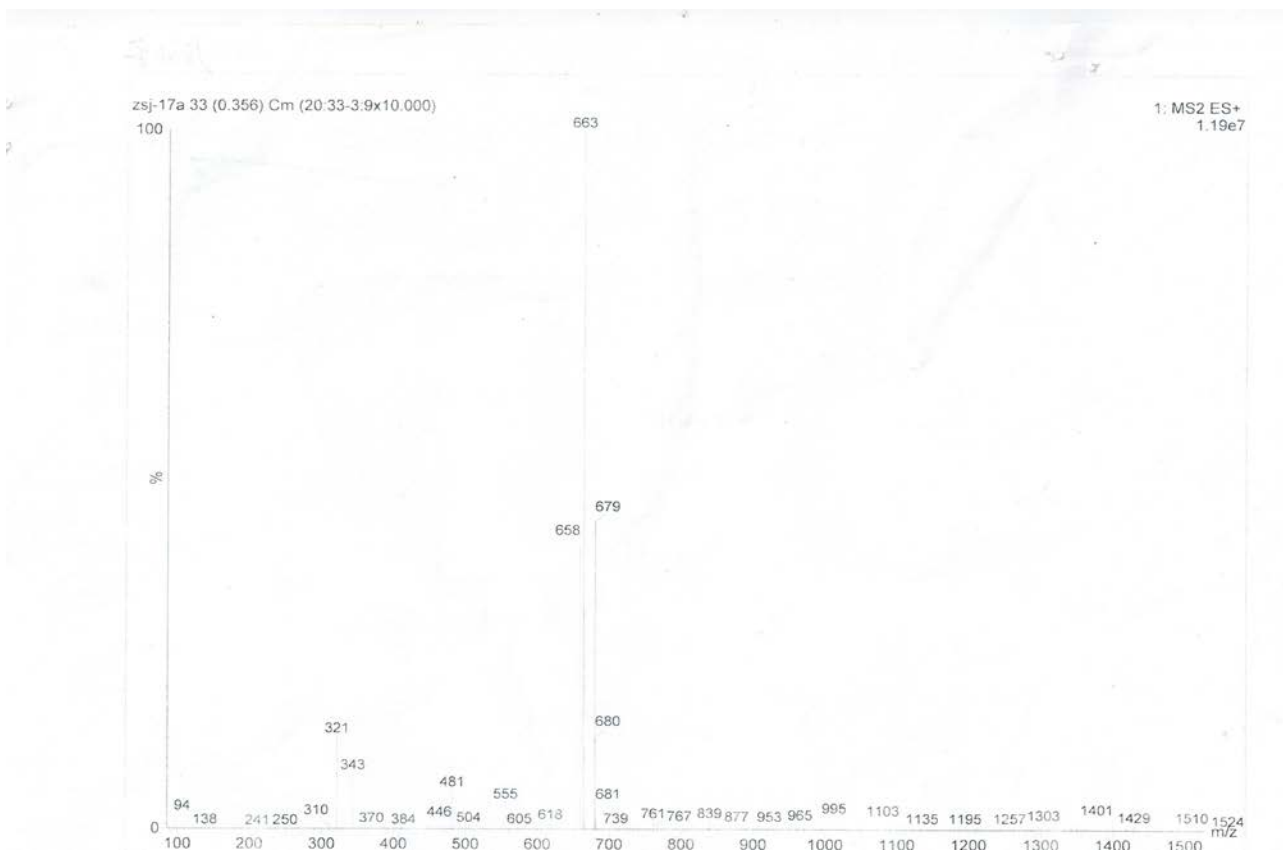

Figure S2. ESIMS of velerivaltrate A (1).

User Spectra

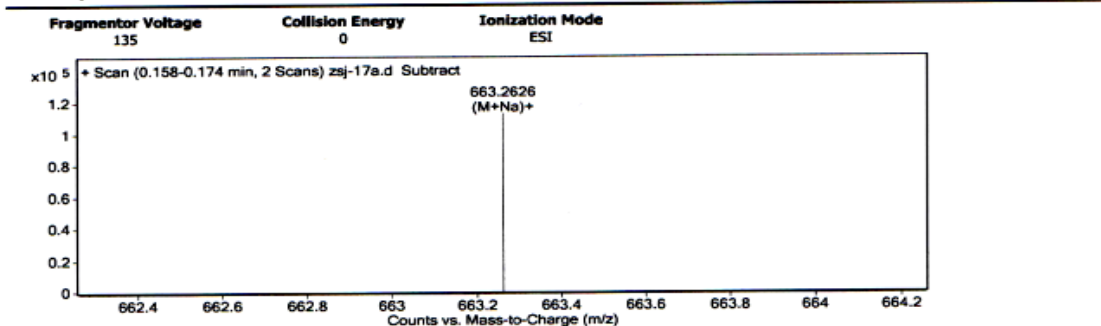

| m/z      | z | Abund     | Formula                                         | Ion                 |
|----------|---|-----------|-------------------------------------------------|---------------------|
| 658.3068 | 1 | 8117.62   |                                                 |                     |
| 663.2626 | 1 | 113270.66 | C <sub>31</sub> H <sub>44</sub> O <sub>14</sub> | (M+Na) <sup>+</sup> |
| 664.2657 | 1 | 34874.75  | C <sub>31</sub> H <sub>44</sub> O <sub>14</sub> | (M+Na) <sup>+</sup> |
| 679.2365 | 1 | 92935.27  |                                                 |                     |
| 680.2396 | 1 | 30632.13  |                                                 |                     |
| 681.239  | 1 | 13419.81  |                                                 |                     |

Formula Calculator Element Limits

| Element | Min | Max |
|---------|-----|-----|
| C       | 3   | 60  |
| H       | 0   | 120 |
| O       | 0   | 20  |

Formula Calculator Results

| Formula                                         | CalculatedMass | CalculatedMz | Mz       | Diff. (mDa) | Diff. (ppm) | DBE     |
|-------------------------------------------------|----------------|--------------|----------|-------------|-------------|---------|
| C <sub>31</sub> H <sub>44</sub> O <sub>14</sub> | 640.2731       | 663.2623     | 663.2626 | -0.2        | -0.3        | 10.0000 |

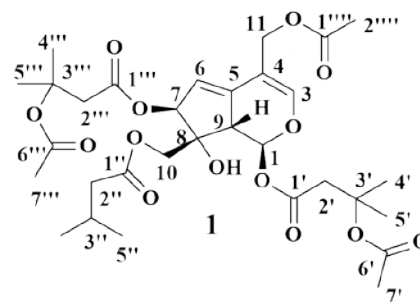

Figure S3. HRESIMS of velerivaltrate A (1).

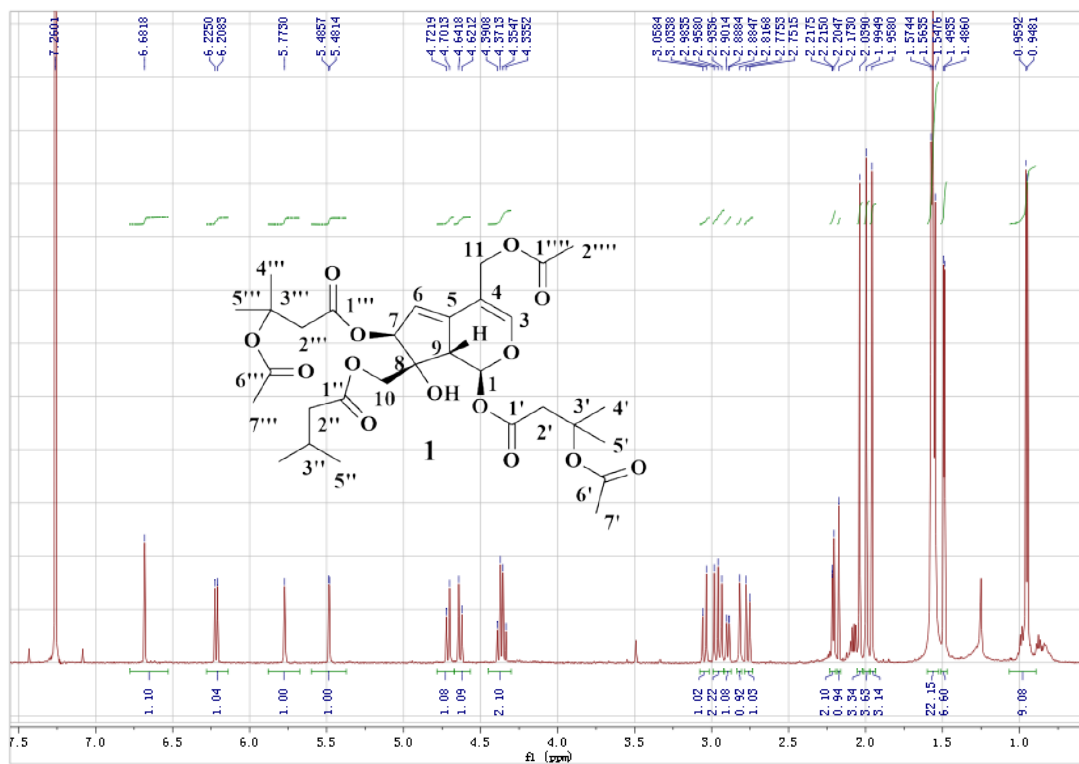

Figure S4.  $^1\text{H}$  NMR (600 MHz,  $\text{CDCl}_3$ ) of velerivaltrate A (1).

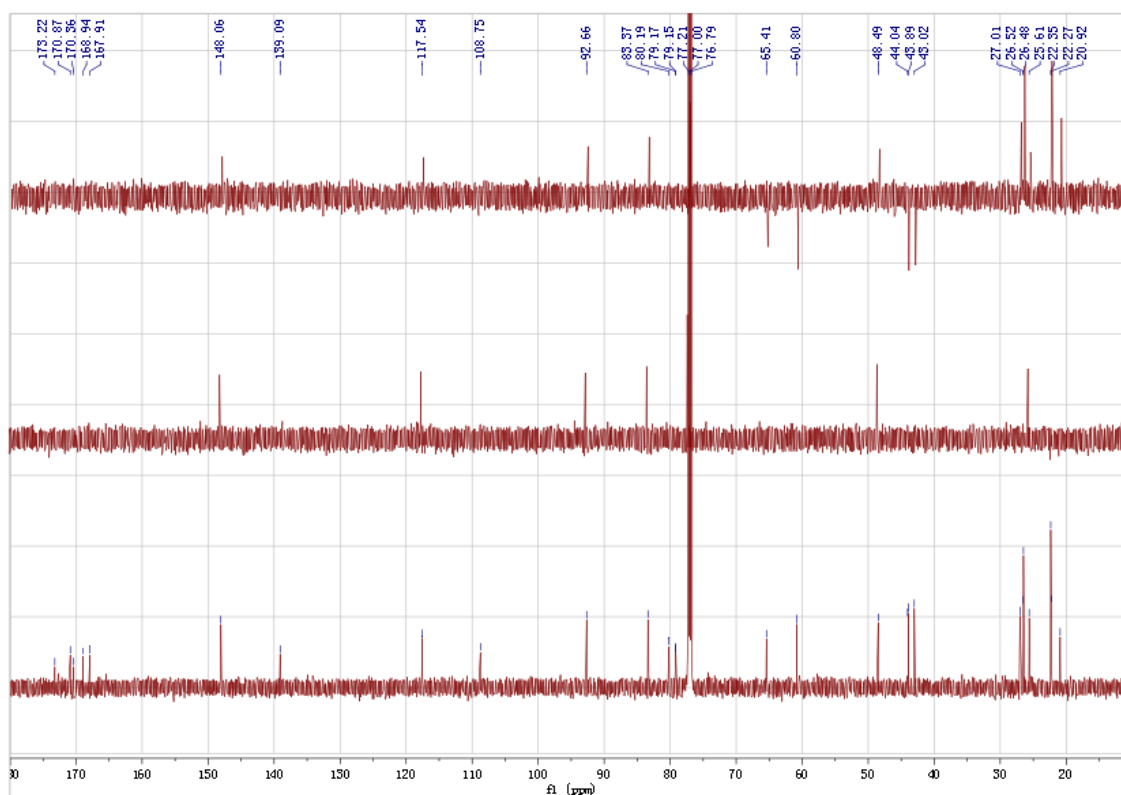

Figure S5.  $^{13}\text{C}$  NMR (100 MHz,  $\text{CDCl}_3$ ) of velerivaltrate A (1).

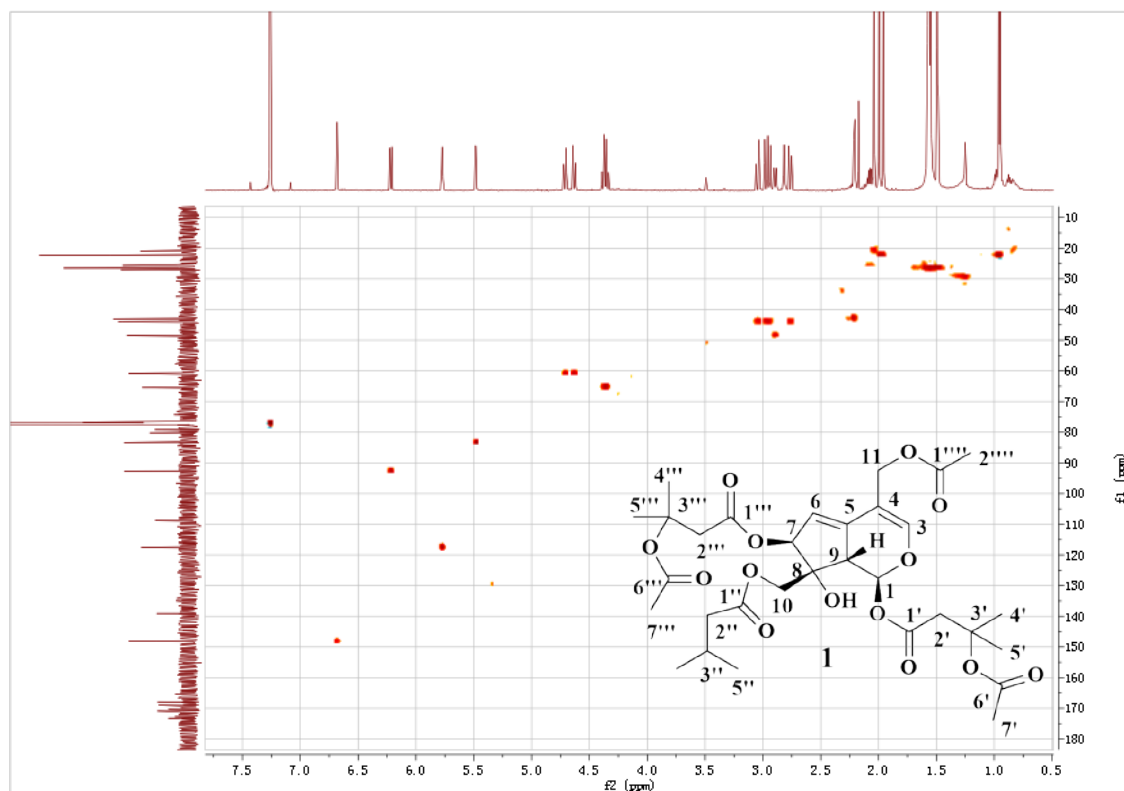

Figure S6. HSQC (600 MHz, CDCl<sub>3</sub>) of velerivaltrate A (1).

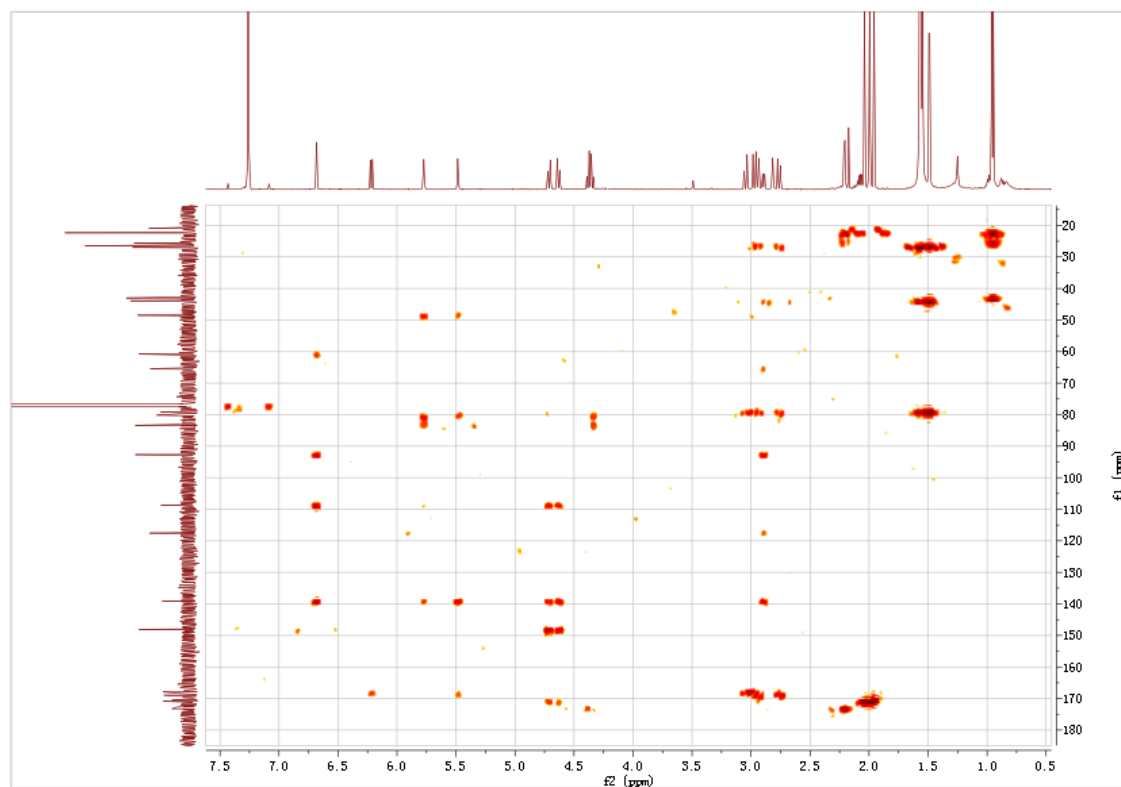

Figure S7. HMBC (600 MHz, CDCl<sub>3</sub>) of velerivaltrate A (1).

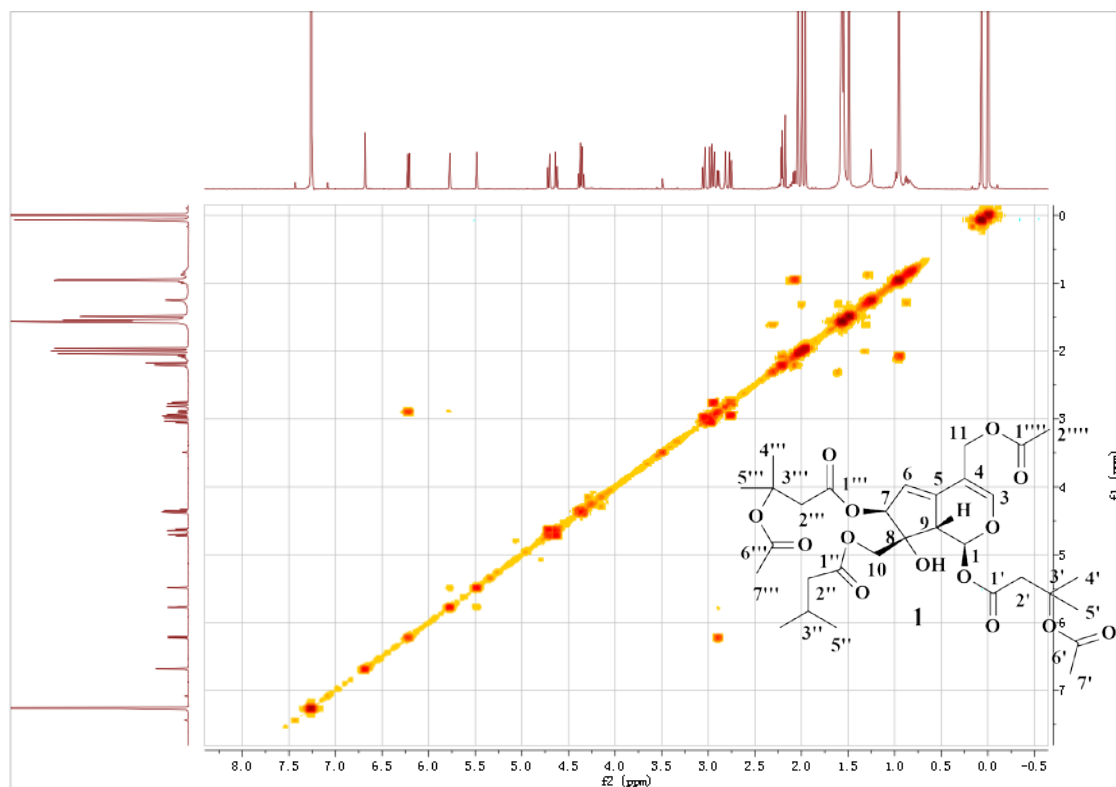

**Figure S8.**  $^1\text{H}$ - $^1\text{H}$  COSY (600 MHz,  $\text{CDCl}_3$ ) of velerivaltrate A (**1**).

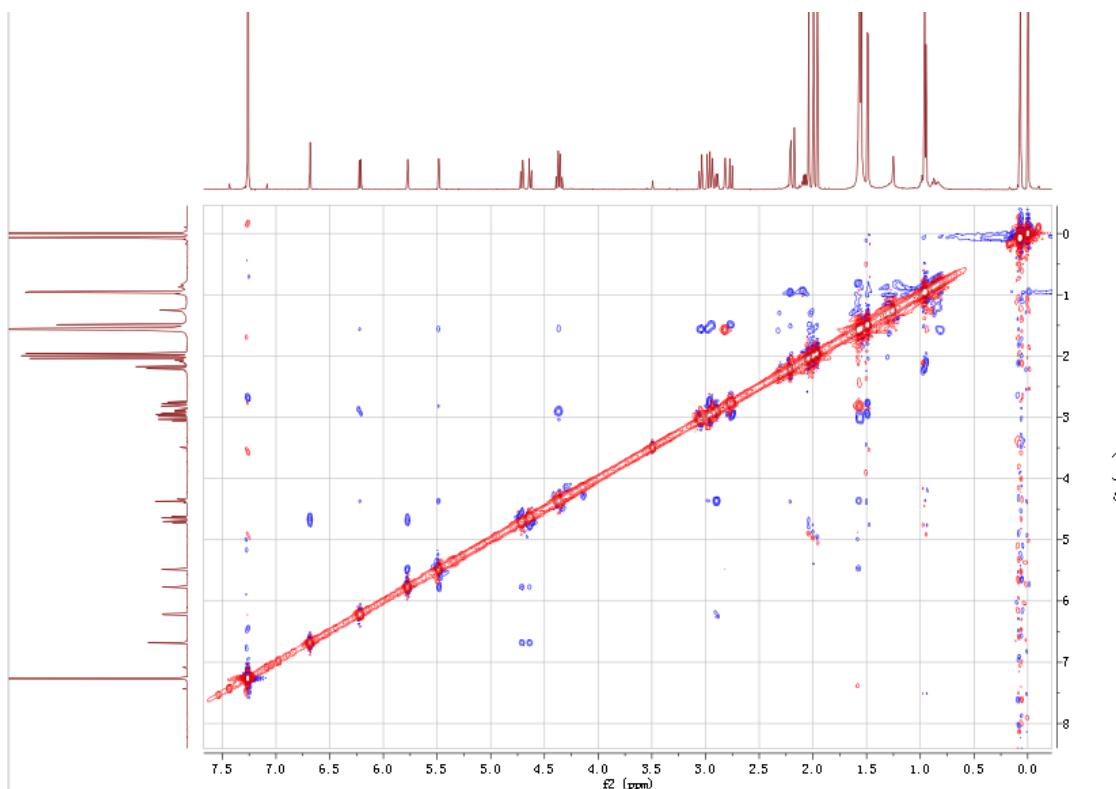

**Figure S9.** ROESY (600 MHz,  $\text{CDCl}_3$ ) of velerivaltrate A (**1**).

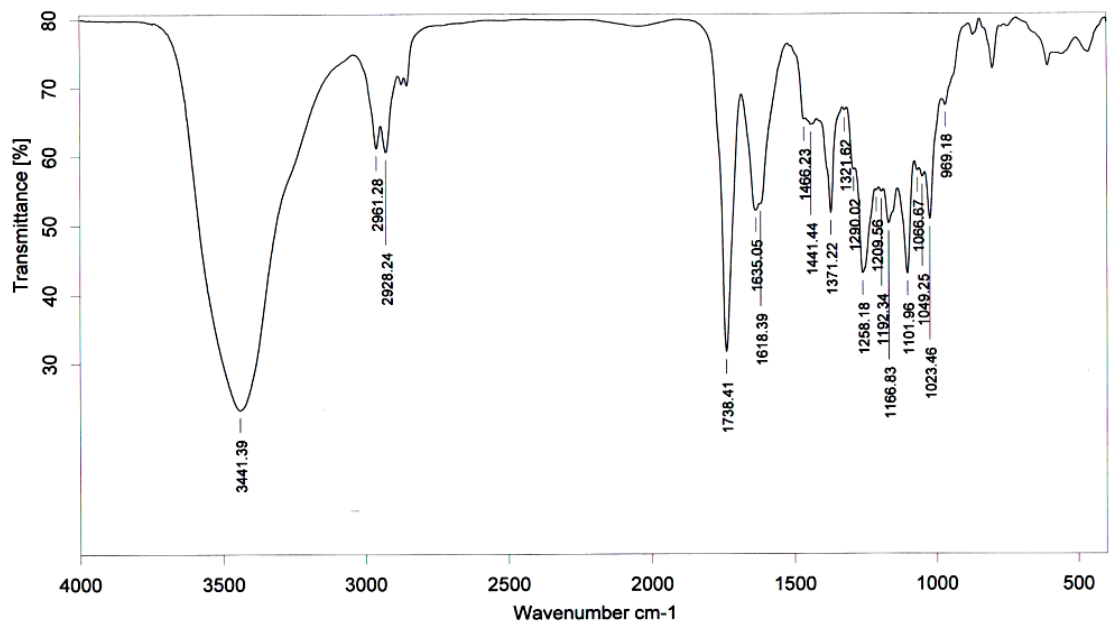

Figure S10. IR spectrum of velerivaltrate A (1).

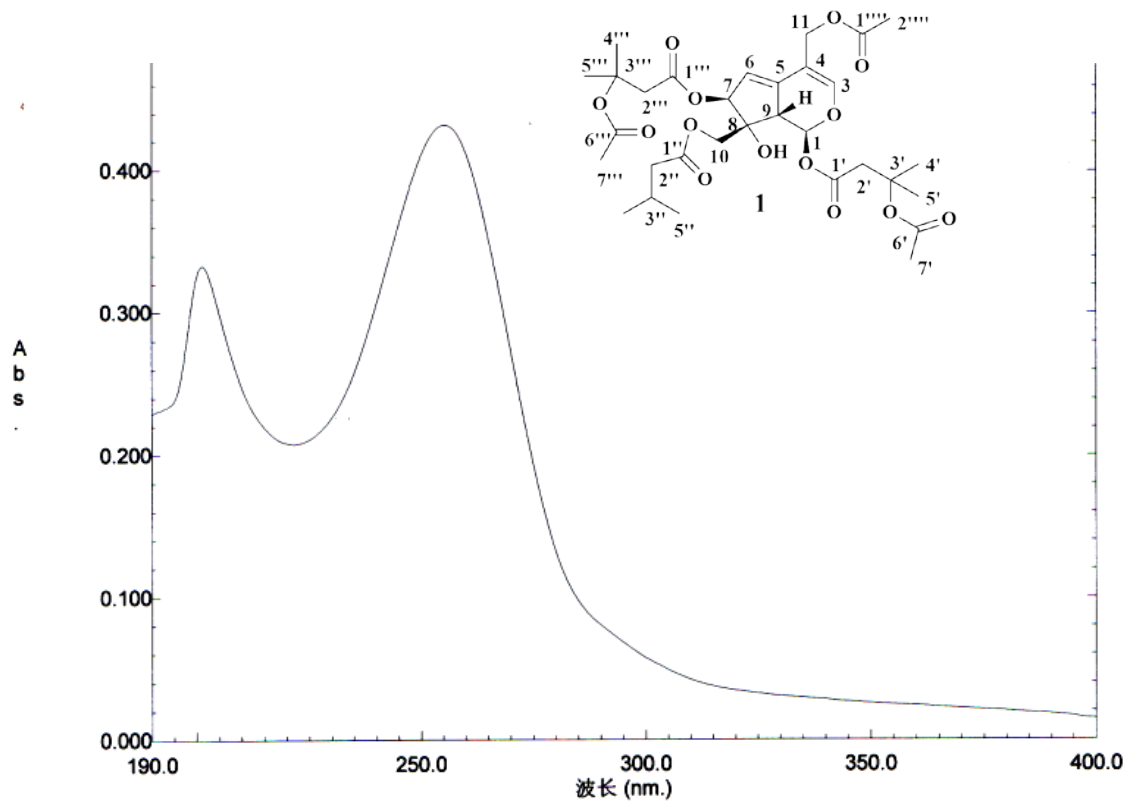

Figure S11. UV spectrum of velerivaltrate A (1).



Optical rotation measurement

Model : P-1020 (A060460638)

| No.  | Sample  | Mode   | Data    | Monitor Blank    | Temp. Cell Temp Point | Date Comment Sample Name                                | Light Filter Operator | Cycle Time Integ Time |
|------|---------|--------|---------|------------------|-----------------------|---------------------------------------------------------|-----------------------|-----------------------|
| No.1 | 6 (1/3) | Sp.Rot | 59.7560 | 0.0049<br>0.0000 | 23.6<br>10.00         | Tue Mar 17 20:16:57 2015<br>0.00082g/mL MeOH<br>ZSJ-17A | Na<br>589nm           | 2 sec<br>10 sec       |
| No.2 | 6 (2/3) | Sp.Rot | 53.6590 | 0.0044<br>0.0000 | 23.6<br>10.00         | Tue Mar 17 20:17:10 2015<br>0.00082g/mL MeOH<br>ZSJ-17A | Na<br>589nm           | 2 sec<br>10 sec       |
| No.3 | 6 (3/3) | Sp.Rot | 57.3170 | 0.0047<br>0.0000 | 23.6<br>10.00         | Tue Mar 17 20:17:24 2015<br>0.00082g/mL MeOH<br>ZSJ-17A | Na<br>589nm           | 2 sec<br>10 sec       |
| No.4 | 7 (1/3) | Sp.Rot | 64.6340 | 0.0053<br>0.0000 | 23.5<br>10.00         | Tue Mar 17 20:20:53 2015<br>0.00082g/mL MeOH<br>ZSJ-17A | Na<br>589nm           | 2 sec<br>10 sec       |
| No.5 | 7 (2/3) | Sp.Rot | 62.1950 | 0.0051<br>0.0000 | 23.5<br>10.00         | Tue Mar 17 20:21:07 2015<br>0.00082g/mL MeOH<br>ZSJ-17A | Na<br>589nm           | 2 sec<br>10 sec       |
| No.6 | 7 (3/3) | Sp.Rot | 59.7560 | 0.0049<br>0.0000 | 23.5<br>10.00         | Tue Mar 17 20:21:20 2015<br>0.00082g/mL MeOH<br>ZSJ-17A | Na<br>589nm           | 2 sec<br>10 sec       |

+79, 7729°

Figure S12.  $[a]_D$  spectrum of velerivaltrate A (1).

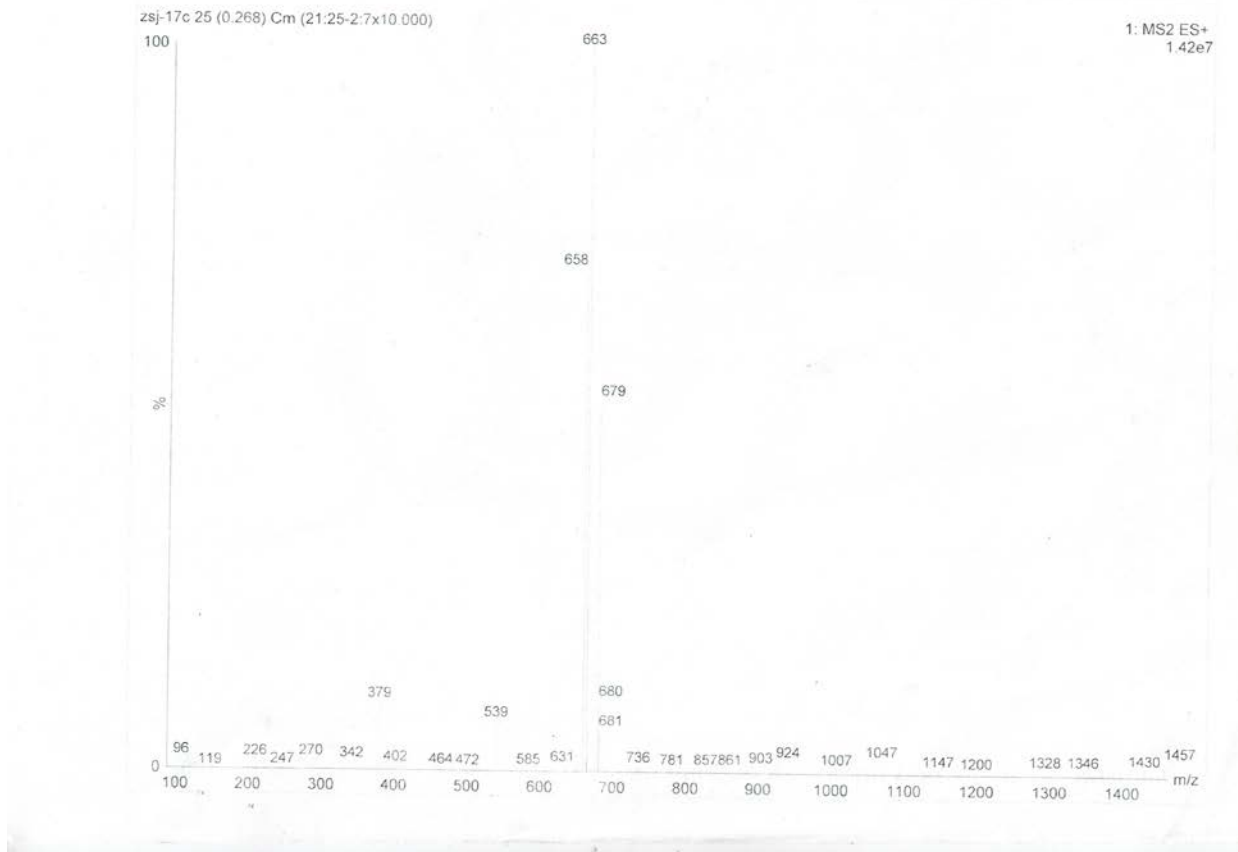

Figure S13. ESIMS of velerivaltrate B (2).

User Spectra

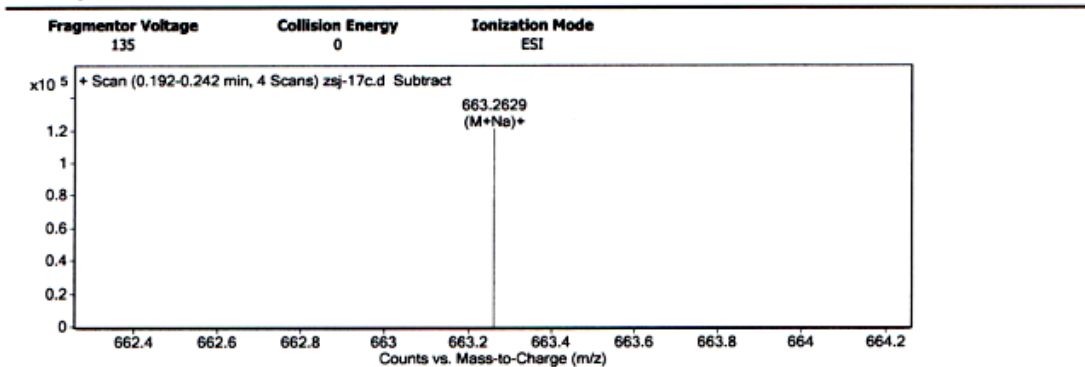

Peak List

| m/z      | z | Abund    | Formula                                         | Ion                 |
|----------|---|----------|-------------------------------------------------|---------------------|
| 98.9757  |   | 15997.56 |                                                 |                     |
| 658.3077 | 1 | 33192.18 |                                                 |                     |
| 663.2629 | 1 | 121395.2 | C <sub>31</sub> H <sub>44</sub> O <sub>14</sub> | (M+Na) <sup>+</sup> |
| 664.2662 | 1 | 39953.23 | C <sub>31</sub> H <sub>44</sub> O <sub>14</sub> | (M+Na) <sup>+</sup> |
| 679.237  | 1 | 69500.72 |                                                 |                     |
| 680.2405 | 1 | 22352.55 |                                                 |                     |

Formula Calculator Element Limits

| Element | Min | Max |
|---------|-----|-----|
| C       | 3   | 60  |
| H       | 0   | 120 |
| O       | 0   | 30  |

Formula Calculator Results

| Formula                                         | CalculatedMass | CalculatedMz | Mz       | Diff. (mDa) | Diff. (ppm) | DBE     |
|-------------------------------------------------|----------------|--------------|----------|-------------|-------------|---------|
| C <sub>31</sub> H <sub>44</sub> O <sub>14</sub> | 640.2731       | 663.2623     | 663.2629 | -0.6        | -0.9        | 10.0000 |

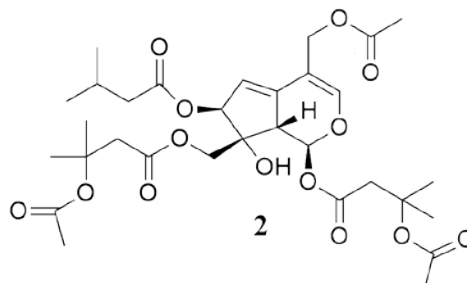

Figure S14. HRESIMS of velerivaltrate B (2).

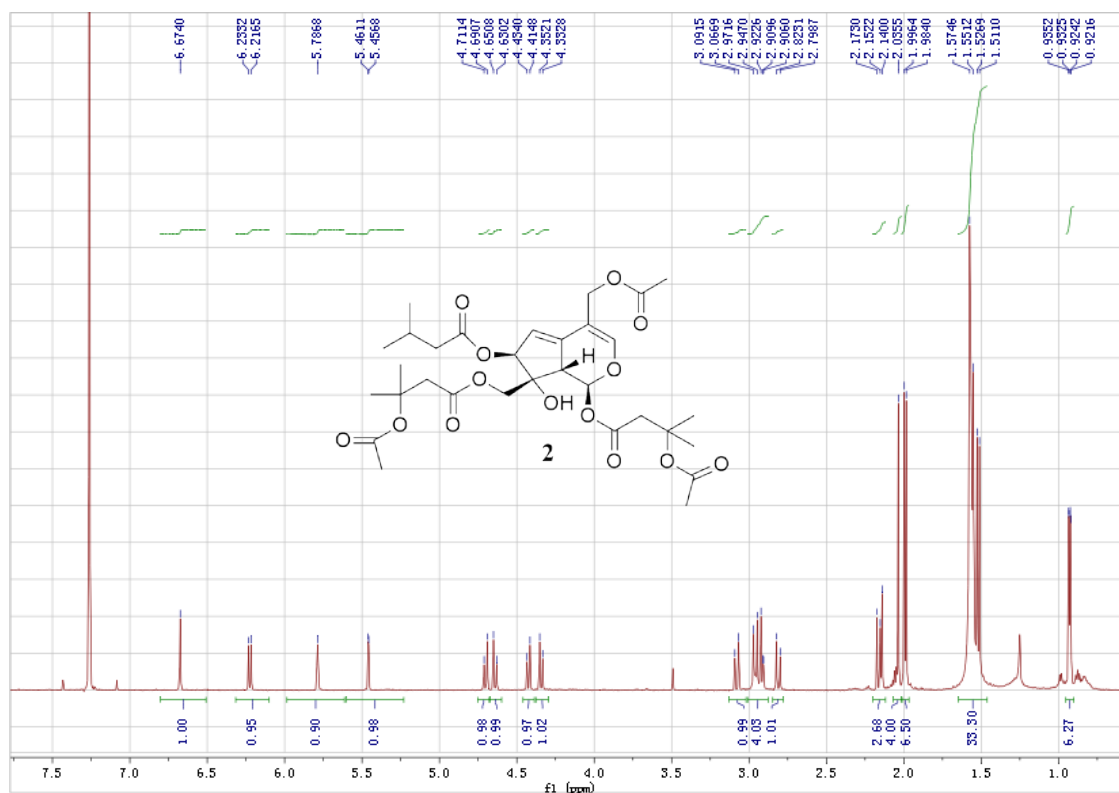

Figure S15.  $^1\text{H}$  NMR (600 MHz,  $\text{CDCl}_3$ ) of velerivaltrate B (2).

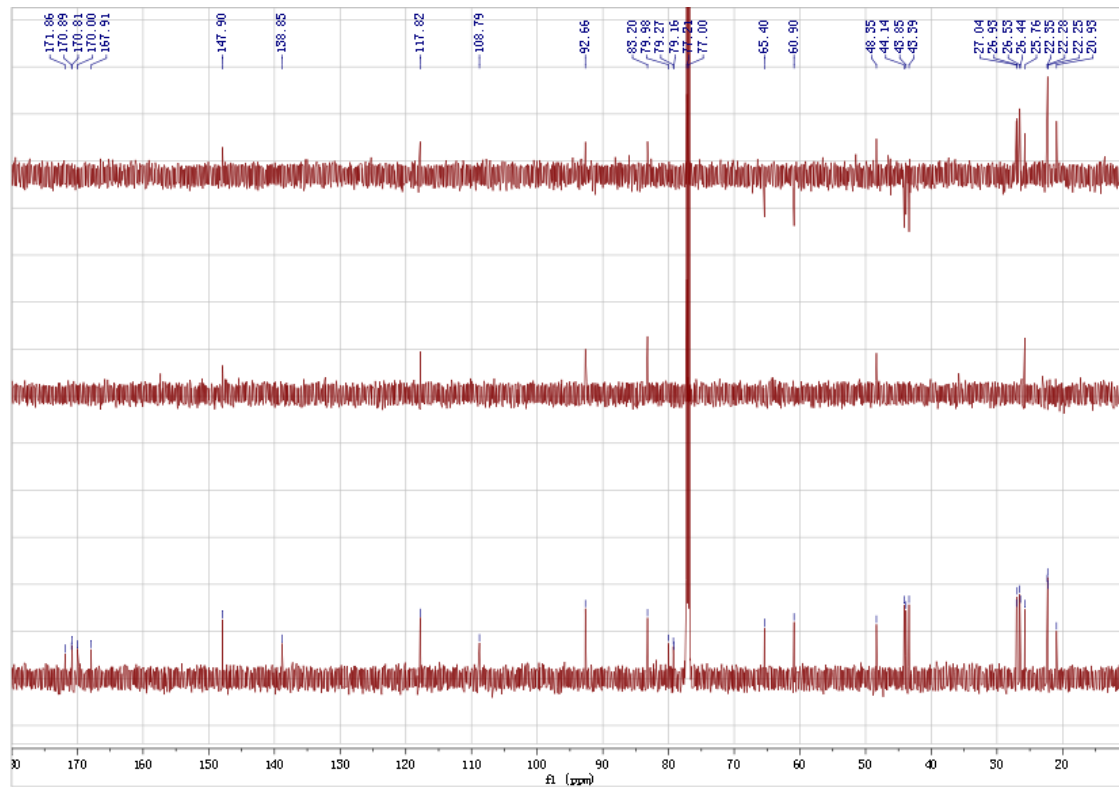

Figure S16.  $^{13}\text{C}$  NMR (100 MHz,  $\text{CDCl}_3$ ) of velerivaltrate B (2).

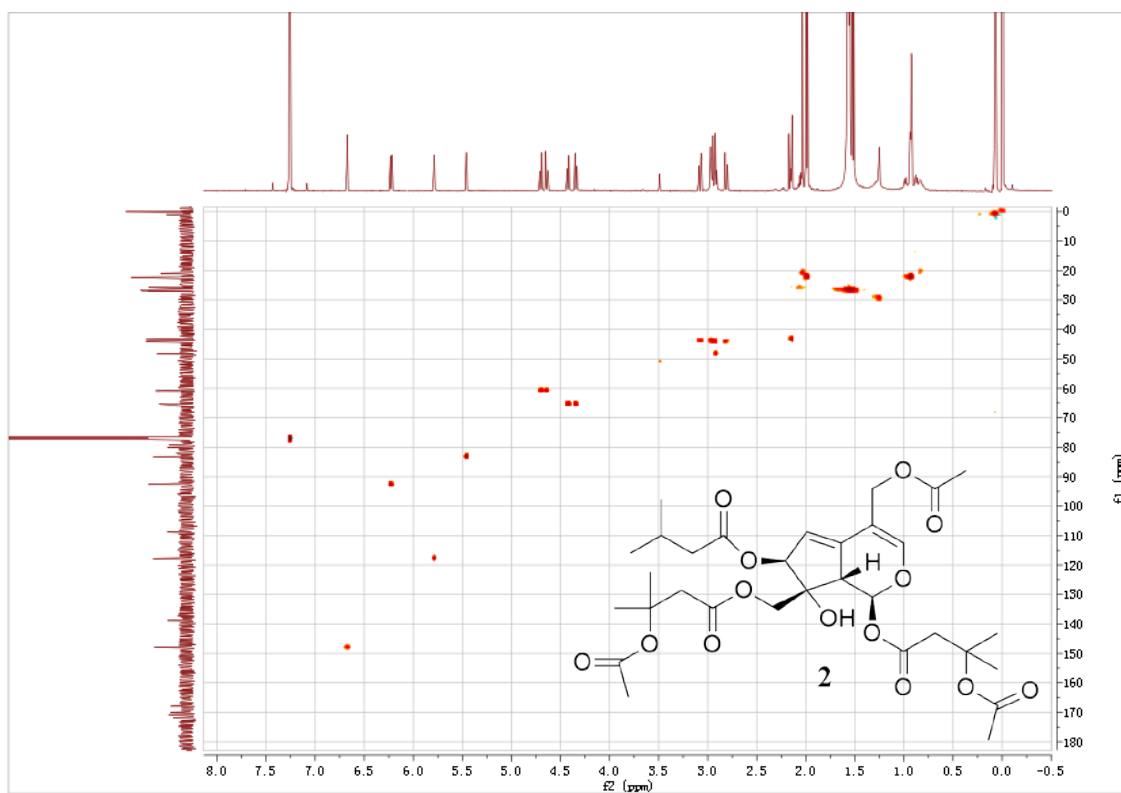

**Figure S17.** HSQC (600 MHz, CDCl<sub>3</sub>) of velerivaltrate B (2).

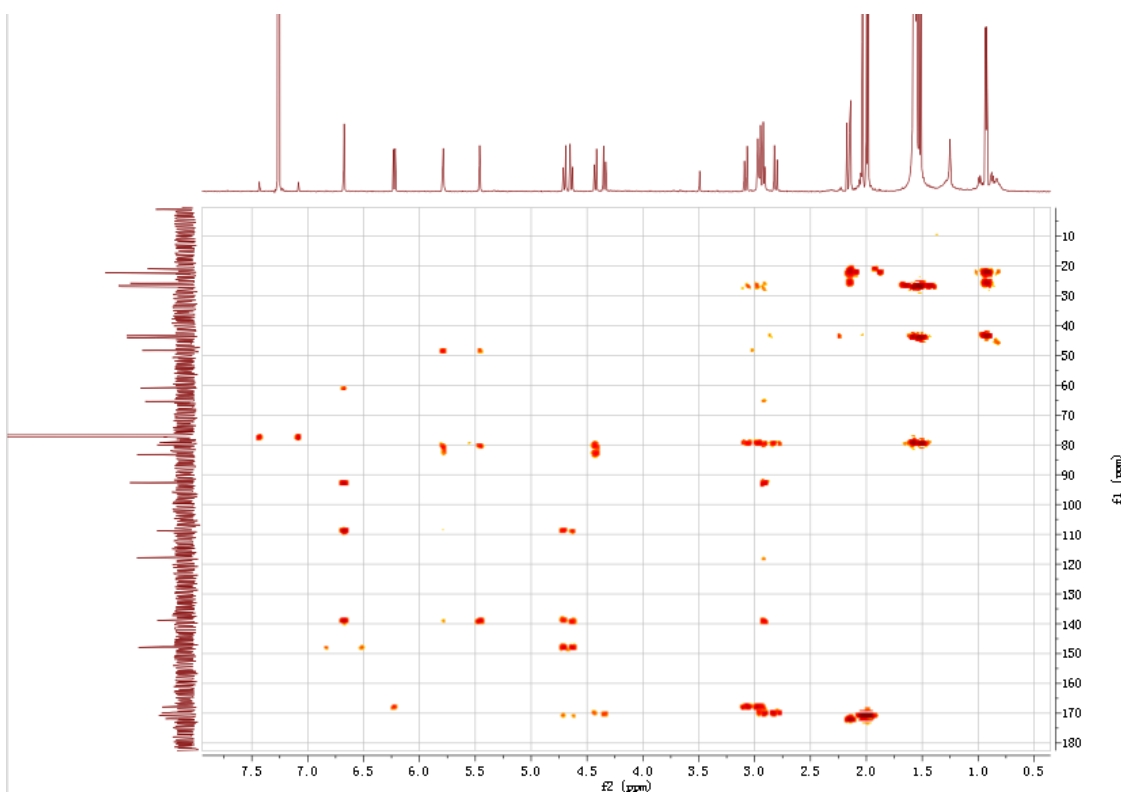

**Figure S18.** HMBC (600 MHz, CDCl<sub>3</sub>) of velerivaltrate B (2).

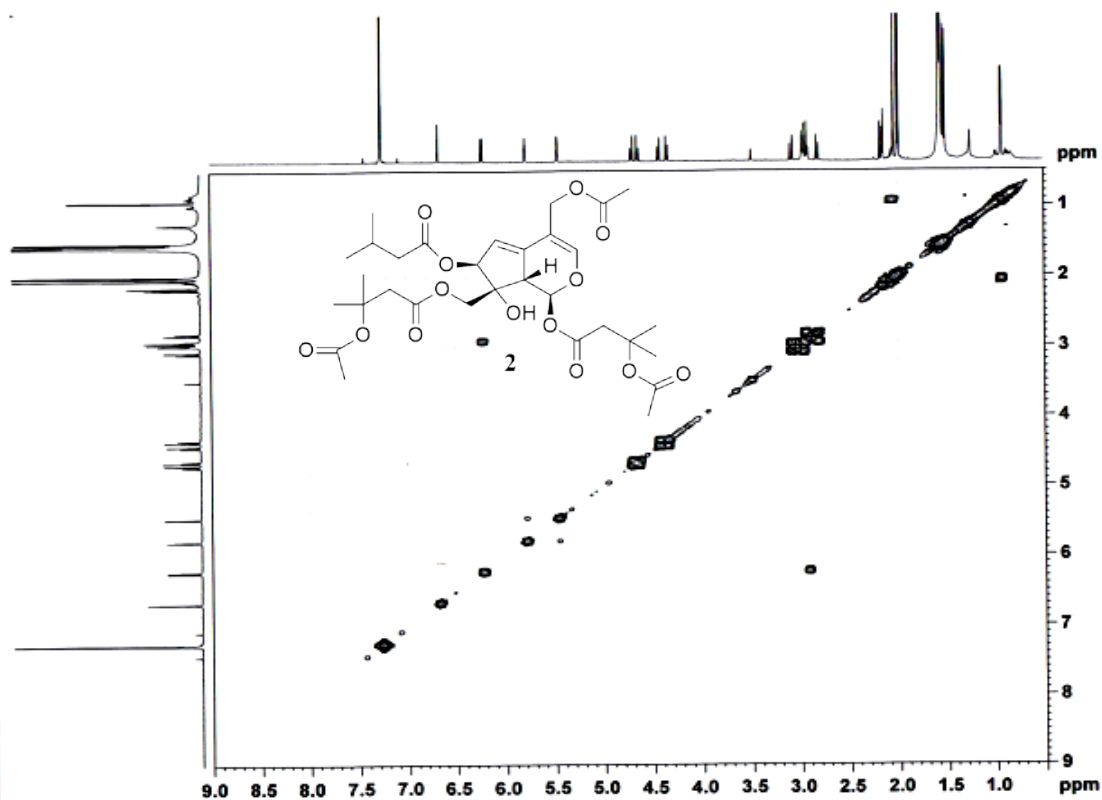

Figure S19.  $^1\text{H}$ - $^1\text{H}$  COSY (600 MHz,  $\text{CDCl}_3$ ) of velerivaltrate B (2).

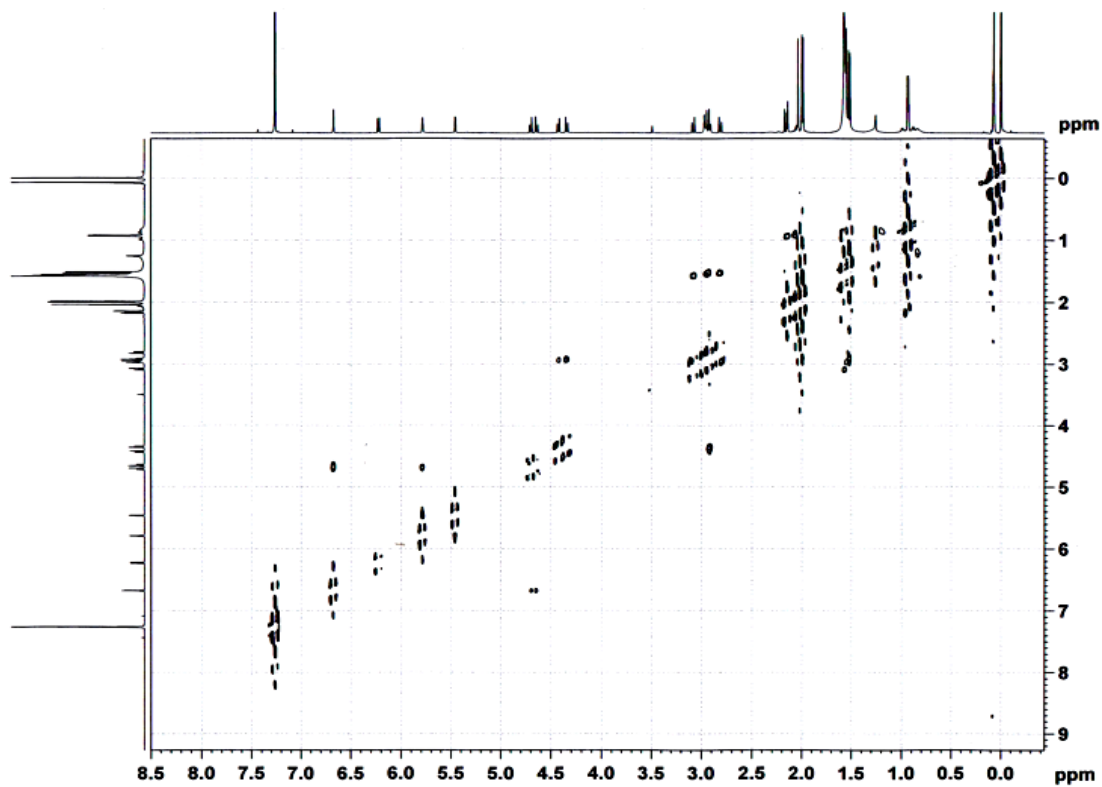

Figure S20. ROESY (600 MHz,  $\text{CDCl}_3$ ) of velerivaltrate B (2).

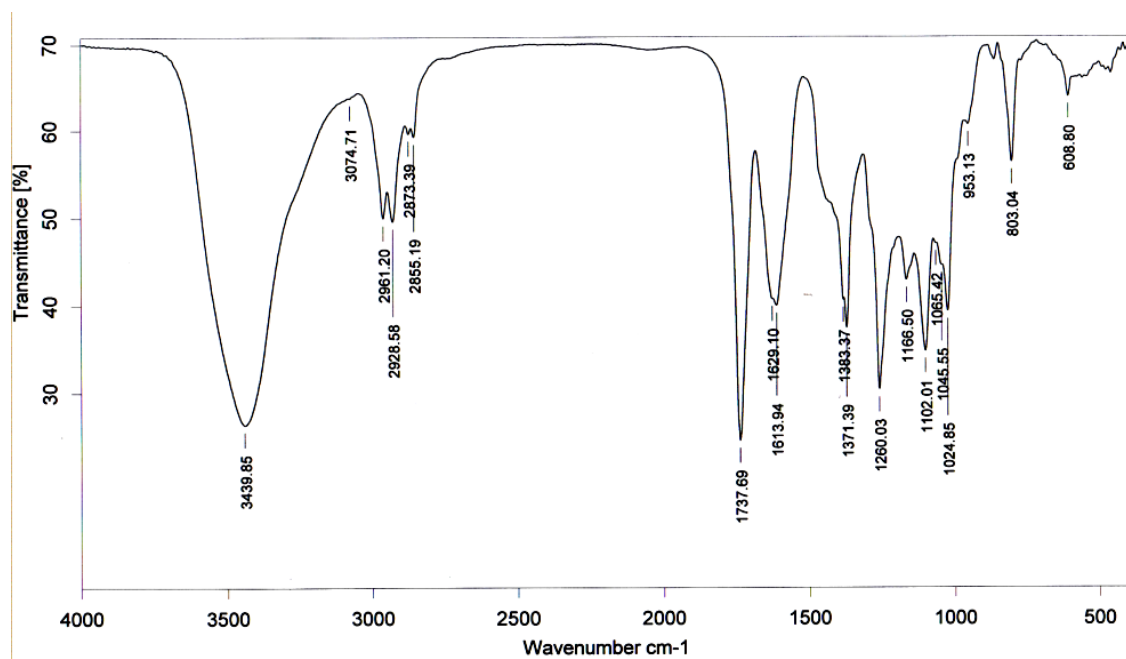

Figure S21. IR spectrum of velerivaltrate B (2).

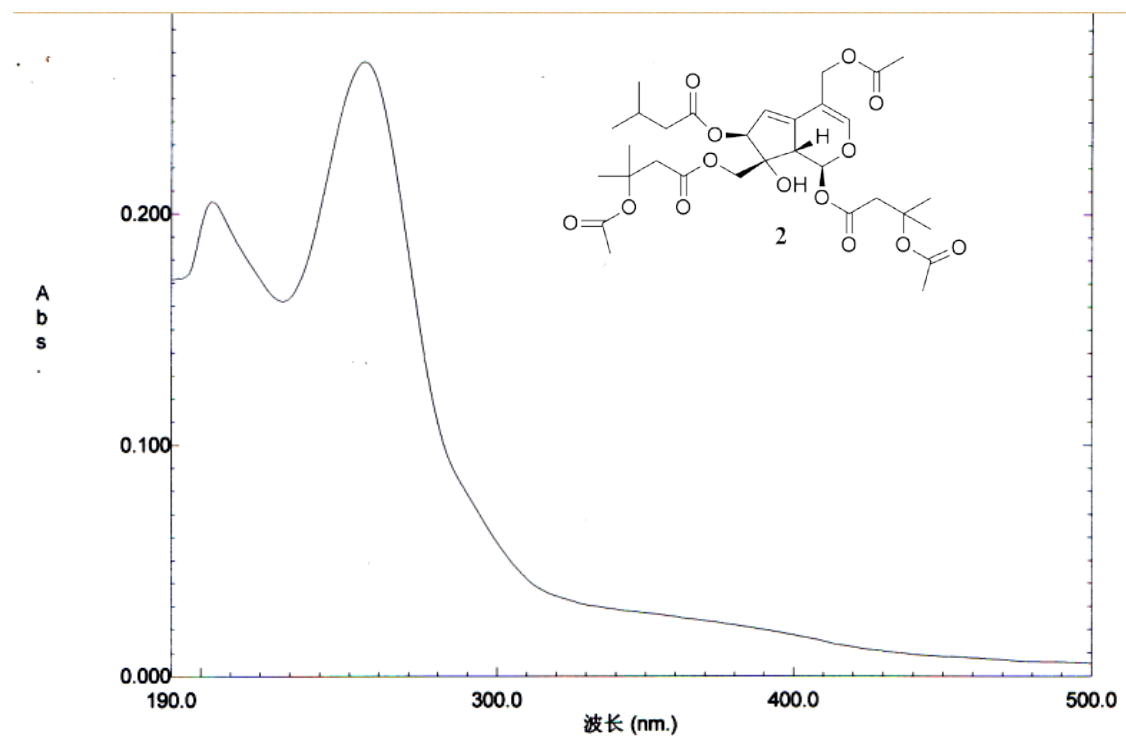

Figure S22. UV spectrum of velerivaltrate B (2).

Optical rotation measurement

Model : P-1020 (A060460638)

| No.  | Sample   | Mode   | Data    | Monitor<br>Blank | Temp.<br>Cell<br>Temp Point | Date<br>Comment<br>Sample Name                          | Light<br>Filter<br>Operator | Cycle Time<br>Integ Time |
|------|----------|--------|---------|------------------|-----------------------------|---------------------------------------------------------|-----------------------------|--------------------------|
| No.1 | 13 (1/3) | Sp.Rot | 38.8060 | 0.0052<br>0.0000 | 23.3<br>10.00               | Fri Mar 20 19:46:49 2015<br>0.00134g/mL MeOH<br>ZSJ-17C | Na<br>589nm                 | 2 sec<br>10 sec          |
| No.2 | 13 (2/3) | Sp.Rot | 35.8210 | 0.0048<br>0.0000 | 23.3<br>10.00               | Fri Mar 20 19:47:02 2015<br>0.00134g/mL MeOH<br>ZSJ-17C | Na<br>589nm                 | 2 sec<br>10 sec          |
| No.3 | 13 (3/3) | Sp.Rot | 36.5670 | 0.0049<br>0.0000 | 23.3<br>10.00               | Fri Mar 20 19:47:16 2015<br>0.00134g/mL MeOH<br>ZSJ-17C | Na<br>589nm                 | 2 sec<br>10 sec          |

+3}.064}

Figure S23.  $[\alpha]_D$  spectrum of velerivaltrate B (2).

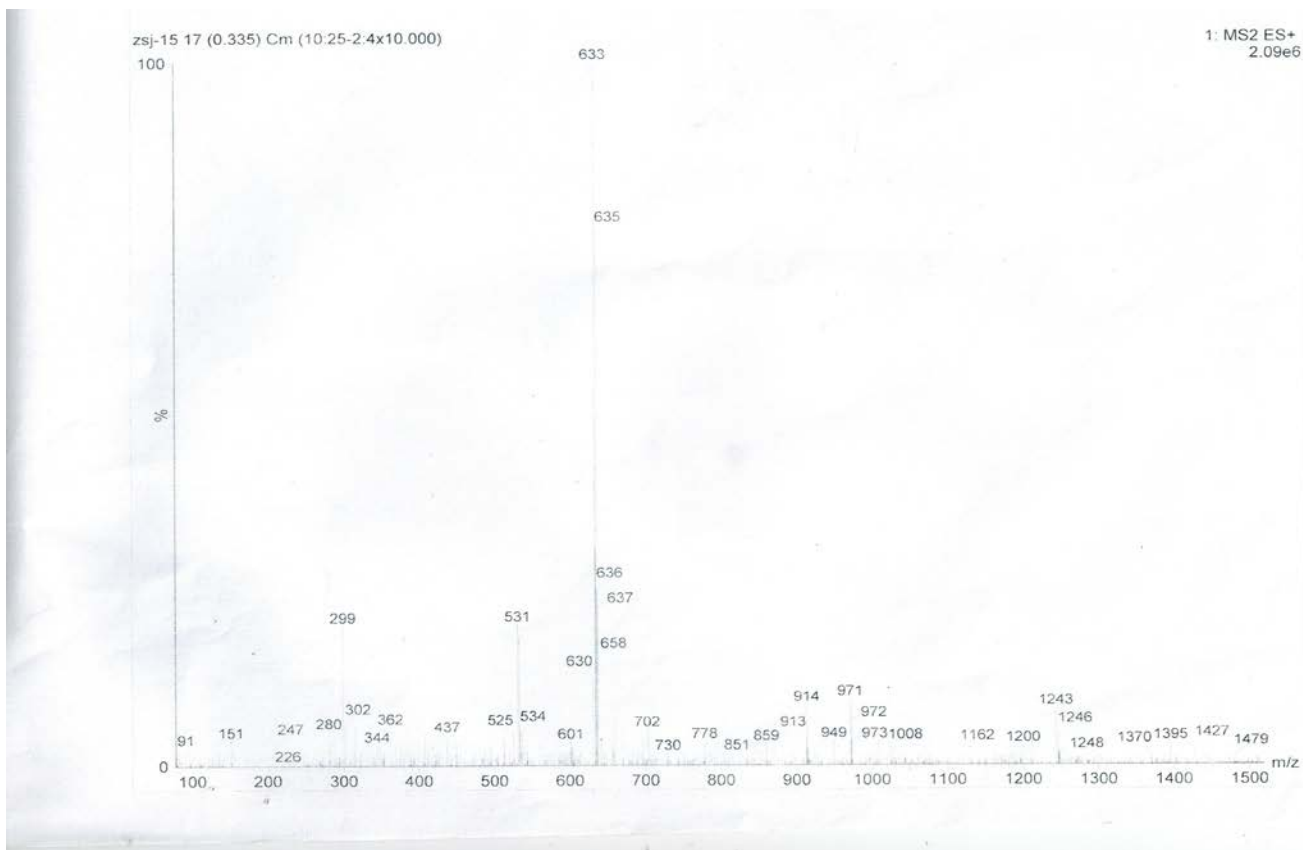

Figure S24. ESIMS of velerivaltrate C (3).

User Spectra

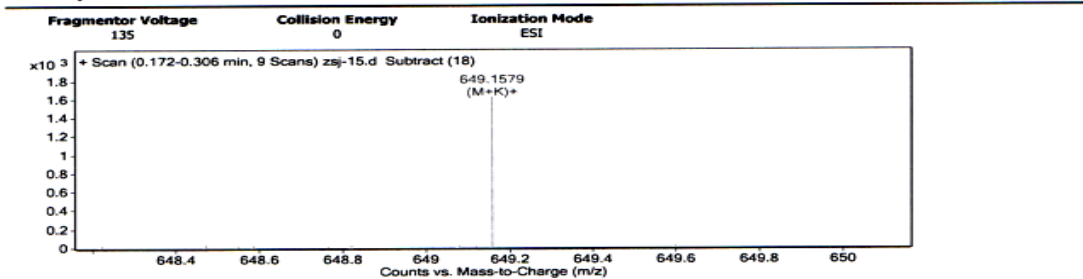

Peak List

| m/z      | z | Abund   | Formula         | Ion    |
|----------|---|---------|-----------------|--------|
| 158.0389 |   | 681.6   |                 |        |
| 177.0138 |   | 965.13  |                 |        |
| 338.0772 |   | 493.73  |                 |        |
| 412.0962 |   | 664.48  |                 |        |
| 427.0681 |   | 1032.35 |                 |        |
| 503.2979 | 1 | 849.02  |                 |        |
| 520.2757 |   | 596.98  |                 |        |
| 633.1851 | 1 | 838.37  |                 |        |
| 649.1579 |   | 1622.7  | C27 H40 Cl2 O11 | (M+K)+ |
| 651.1561 |   | 1003.32 |                 |        |

Formula Calculator Element Limits

| Element | Min | Max |
|---------|-----|-----|
| C       | 3   | 60  |
| H       | 0   | 120 |
| O       | 0   | 15  |
| N       | 0   | 10  |
| Cl      | 0   | 5   |

Formula Calculator Results

| Formula         | CalculatedMass | CalculatedMz | Mz       | Diff. (mDa) | Diff. (ppm) | DBE    |
|-----------------|----------------|--------------|----------|-------------|-------------|--------|
| C27 H40 Cl2 O11 | 610.1948       | 649.1579     | 649.1579 | 0.1         | 0.1         | 7.0000 |

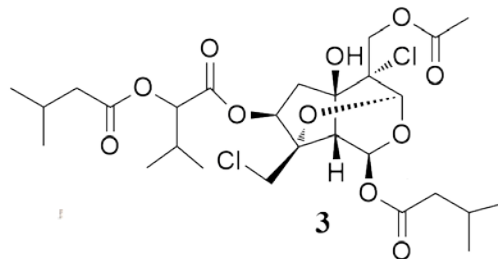

Figure S25. HRESIMS of velerivaltrate C (3).



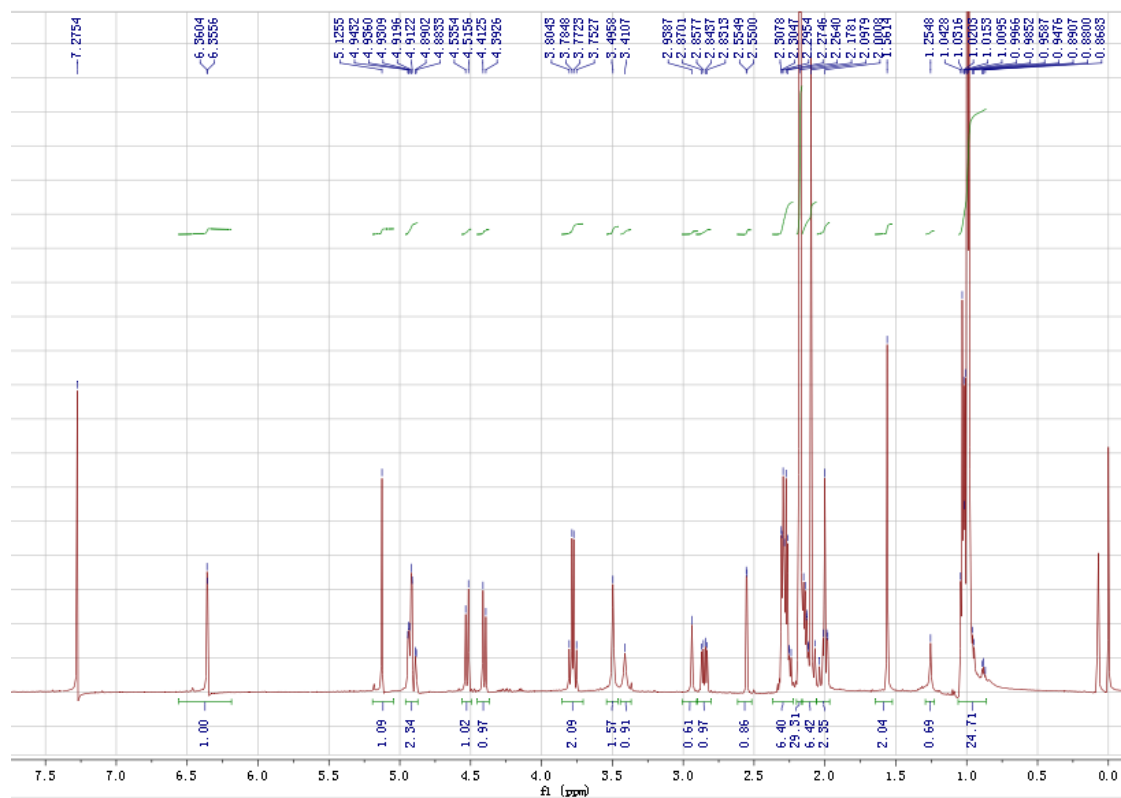

Figure S26.  $^1\text{H}$  NMR (600 MHz,  $\text{CDCl}_3$ ) of velerivaltrate C (3).

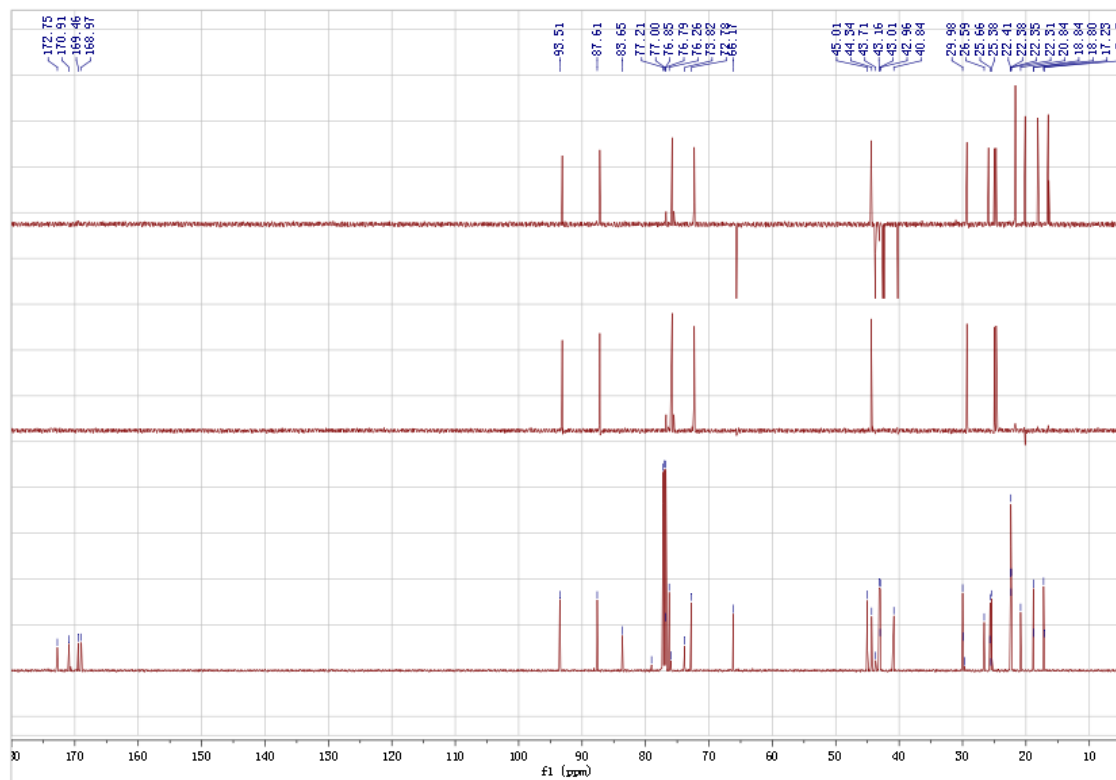

Figure S27.  $^{13}\text{C}$  NMR (100 MHz,  $\text{CDCl}_3$ ) of velerivaltrate C (3).

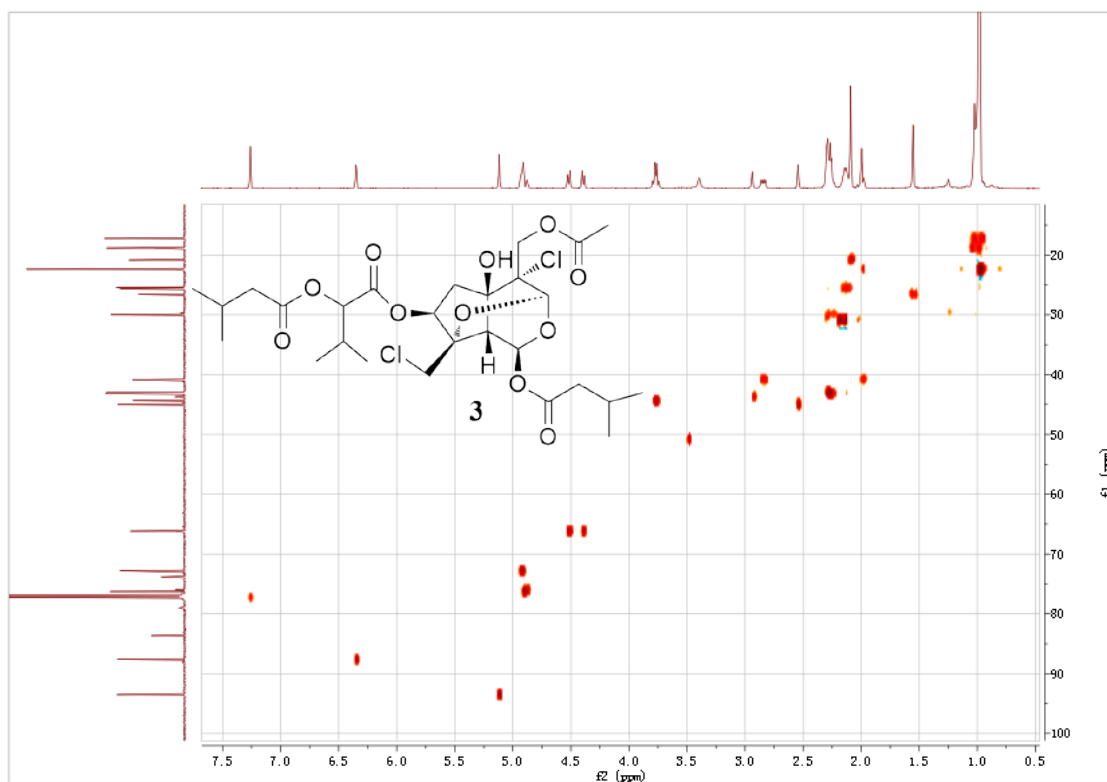

**Figure S28.** HSQC (600 MHz,  $\text{CDCl}_3$ ) of velerivaltrate C (**3**).

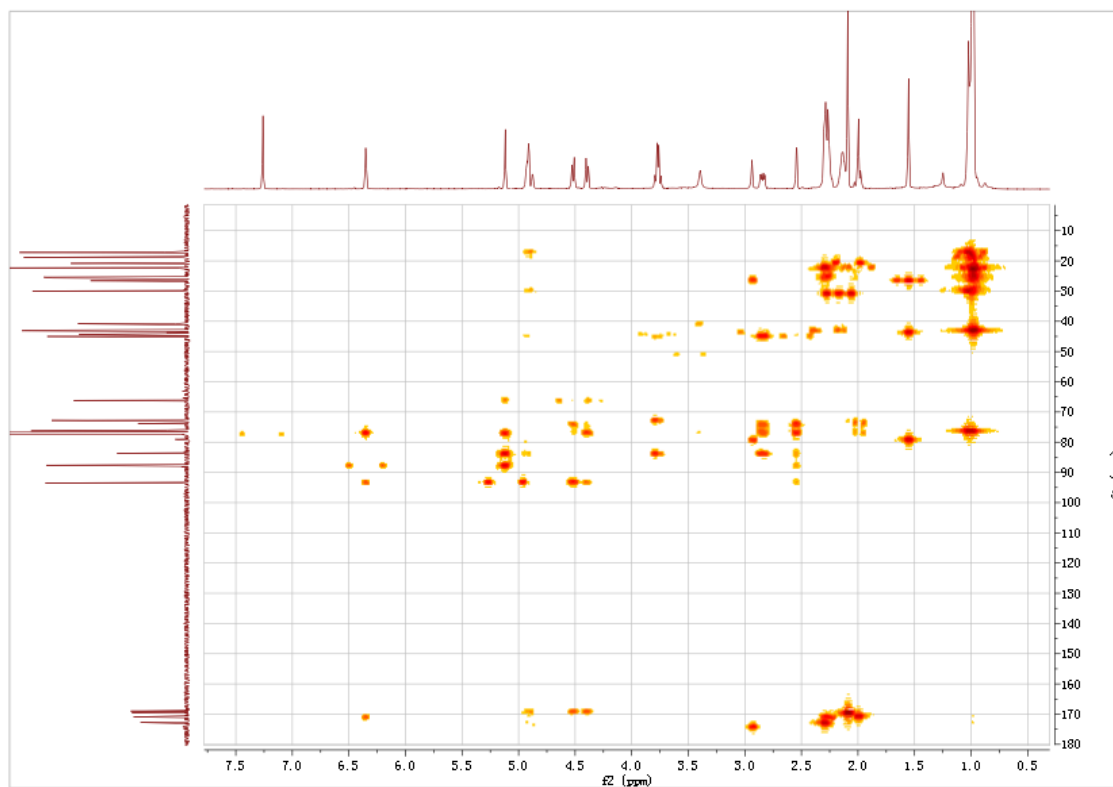

**Figure S29.** HMBC (600 MHz,  $\text{CDCl}_3$ ) of velerivaltrate C (**3**).

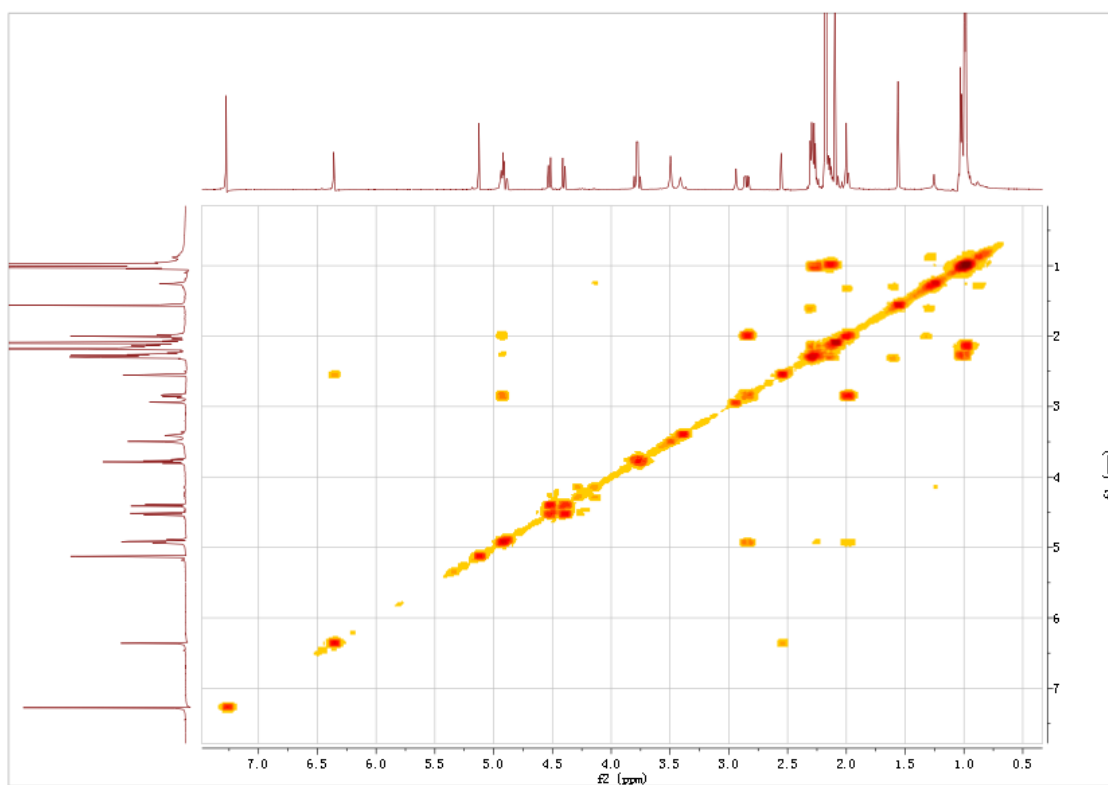

**Figure S30.**  $^1\text{H}$ - $^1\text{H}$  COSY (600 MHz,  $\text{CDCl}_3$ ) of velerivaltrate C (**3**).

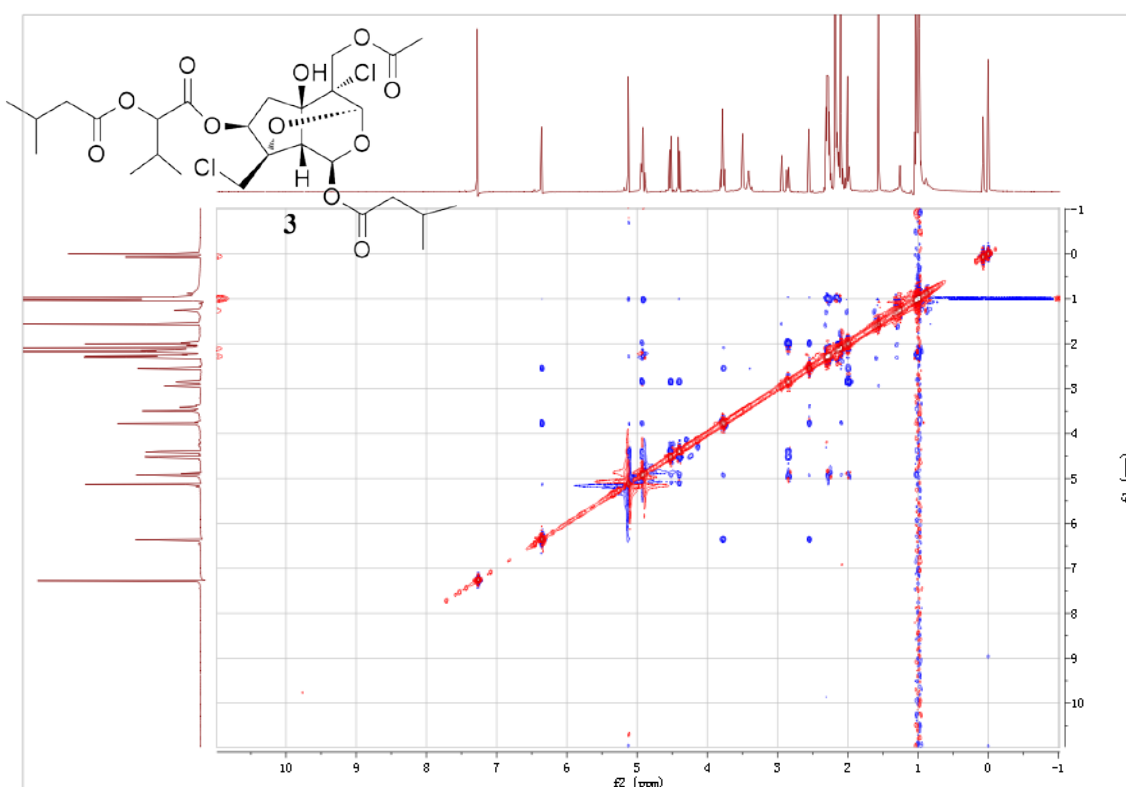

**Figure S31.** ROESY (600 MHz,  $\text{CDCl}_3$ ) of velerivaltrate C (**3**).

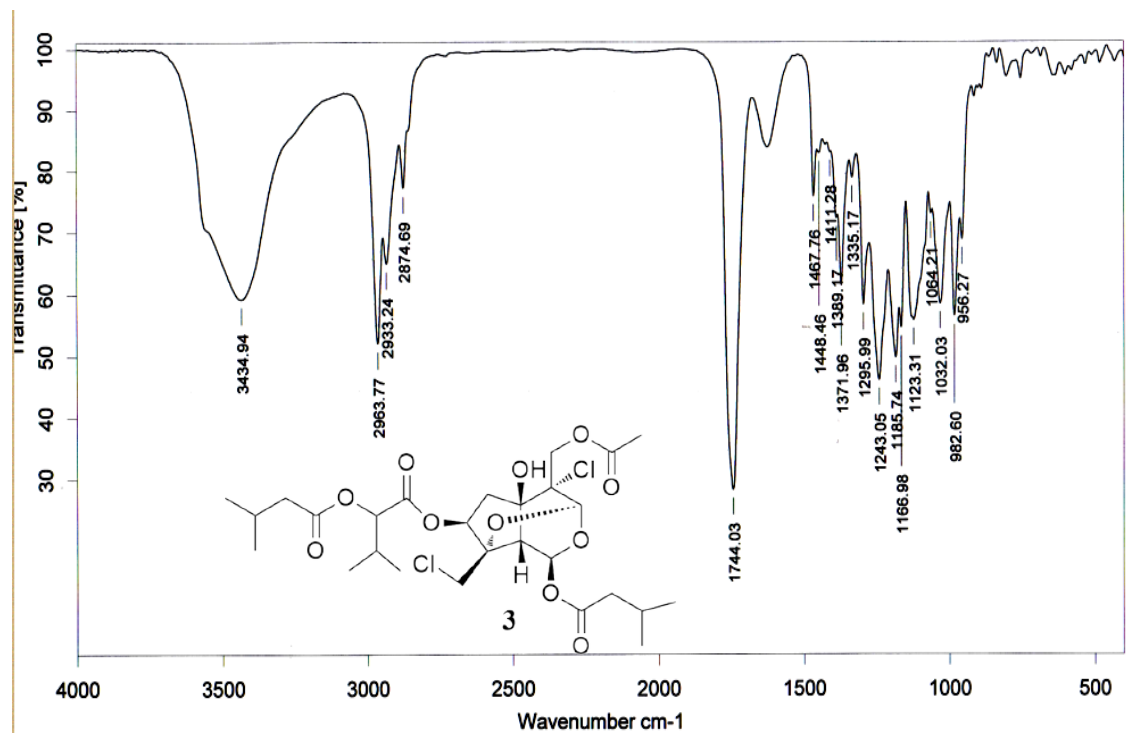

Figure S32. IR spectrum of velerivaltrate C (3).

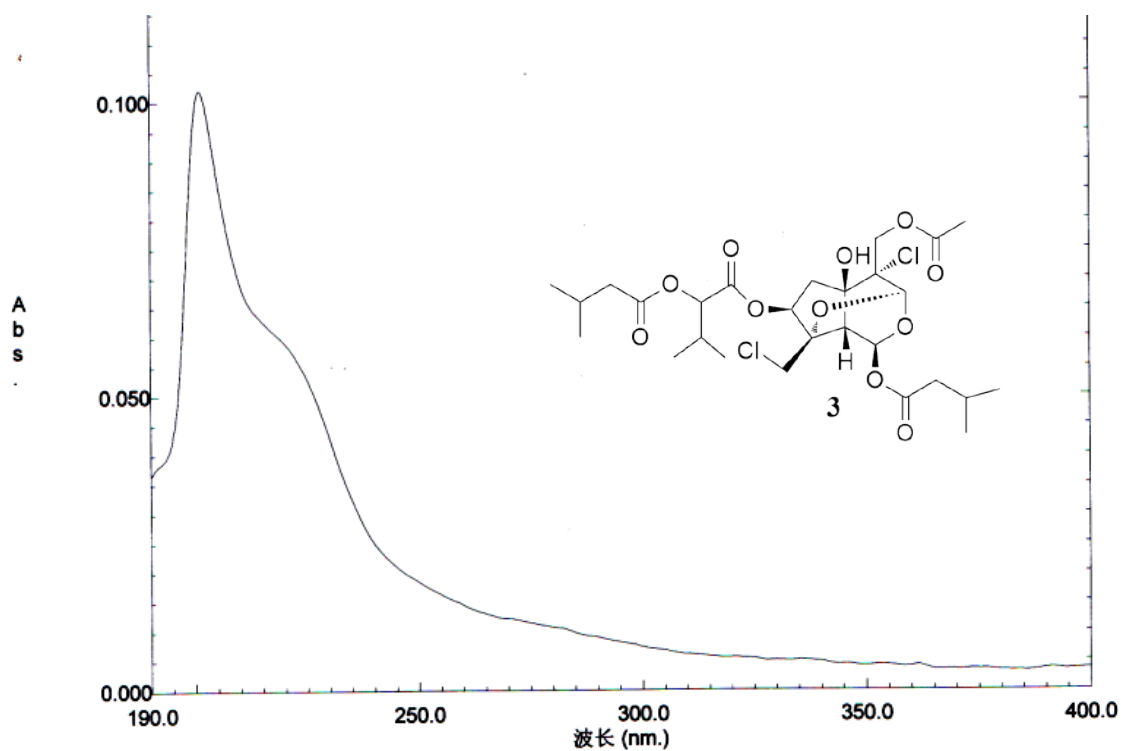

Figure S33. UV spectrum of velerivaltrate C (3).

Optical rotation measurement

Model : P-1020 (A060460638)

| No.  | Sample  | Mode   | Data    | Monitor<br>Blank | Temp.<br>Cell<br>Temp Point | Date<br>Comment<br>Sample Name                         | Light<br>Filter<br>Operator | Cycle Time<br>Integ Time |
|------|---------|--------|---------|------------------|-----------------------------|--------------------------------------------------------|-----------------------------|--------------------------|
| No.1 | 5 (1/3) | Sp.Rot | 29.1080 | 0.0093<br>0.0000 | 23.6<br>10.00               | Tue Mar 17 20:09:36 2015<br>0.00320g/mL MeOH<br>ZSJ-15 | Na<br>589nm                 | 2 sec<br>10 sec          |
| No.2 | 5 (2/3) | Sp.Rot | 29.4210 | 0.0094<br>0.0000 | 23.6<br>10.00               | Tue Mar 17 20:09:50 2015<br>0.00320g/mL MeOH<br>ZSJ-15 | Na<br>589nm                 | 2 sec<br>10 sec          |
| No.3 | 5 (3/3) | Sp.Rot | 31.6120 | 0.0101<br>0.0000 | 23.6<br>10.00               | Tue Mar 17 20:10:03 2015<br>0.00320g/mL MeOH<br>ZSJ-15 | Na<br>589nm                 | 2 sec<br>10 sec          |

+30.0469°

**Figure S34.**  $[a]_D$  spectrum of velerivaltrate C (3).

**Table S1.** Dose-related effects of compounds **1**, **6**, **7**, **11**, and **12** on peak currents of Ca<sub>v</sub>2.2.

| <b>compounds</b> | <b>concentration (<math>\mu</math>M)</b> | <b>Inhibitory ratio (%)</b> |
|------------------|------------------------------------------|-----------------------------|
| Blank control    | 0.1% DMSO                                | 1.2 $\pm$ 0.8               |
| <b>1</b>         | 1                                        | 7.3 $\pm$ 3.1*              |
|                  | 3                                        | 21.7 $\pm$ 7.3*             |
|                  | 10                                       | 55.9 $\pm$ 3.3*             |
|                  | 30                                       | 59.9 $\pm$ 5.2*             |
|                  | 60                                       | 64.3 $\pm$ 3.9**            |
| <b>6</b>         | 0.6                                      | 9.5 $\pm$ 2.5*              |
|                  | 1                                        | 23.3 $\pm$ 2.9**            |
|                  | 3                                        | 38.2 $\pm$ 2.8**            |
|                  | 10                                       | 56.8 $\pm$ 5.7**            |
|                  | 30                                       | 61.1 $\pm$ 7.8*             |
| <b>7</b>         | 0.3                                      | 2.5 $\pm$ 1.4               |
|                  | 1                                        | 30.6 $\pm$ 4.4**            |
|                  | 3                                        | 51.4 $\pm$ 8.4**            |
|                  | 10                                       | 59.3 $\pm$ 5.4*             |
|                  | 30                                       | 57.2 $\pm$ 7.1*             |
| <b>11</b>        | 0.3                                      | 3.6 $\pm$ 2.10              |
|                  | 1                                        | 9.5 $\pm$ 0.9*              |
|                  | 3                                        | 36.1 $\pm$ 1.9**            |
|                  | 10                                       | 63.1 $\pm$ 1.0**            |
|                  | 30                                       | 63.9 $\pm$ 3.9**            |
| <b>12</b>        | 0.6                                      | 3.9 $\pm$ 2.7               |
|                  | 3                                        | 17.7 $\pm$ 7.7*             |
|                  | 10                                       | 37.0 $\pm$ 6.9**            |
|                  | 30                                       | 61.8 $\pm$ 6.7**            |
|                  | 60                                       | 47.9 $\pm$ 1.7**            |

All the data were analyzed with two-tailed student T test and represented as mean  $\pm$  SEM (n=3) compared with the blank control, \* $P < 0.01$ , \*\* $P < 0.01$ .

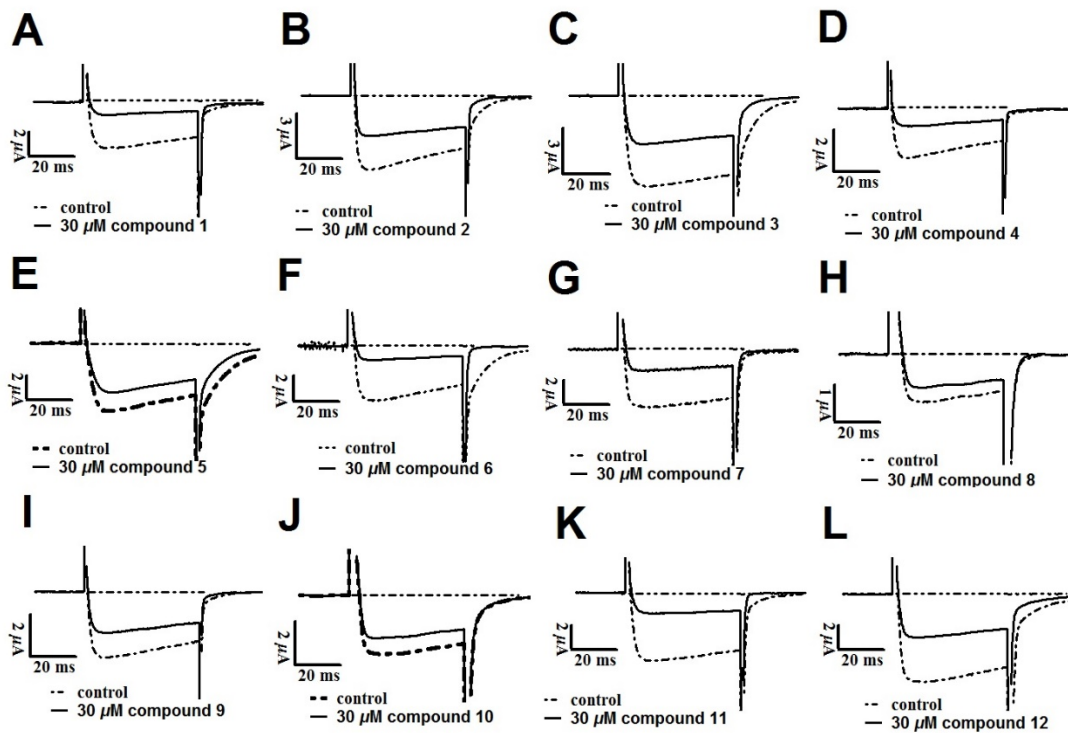

**Figure S35.** Inhibitory effects of compounds **1-12** on  $\text{Ca}_v2.2$  at  $30 \mu\text{M}$ . Representative peak current of  $\text{Ca}_v2.2$  were evoked from a holding potential (HP) of  $-80 \text{ mV}$  by  $50 \text{ ms}$  depolarization to  $+20 \text{ mV}$  at  $3 \text{ s}$  intervals in the absence or presence of the indicated compounds.

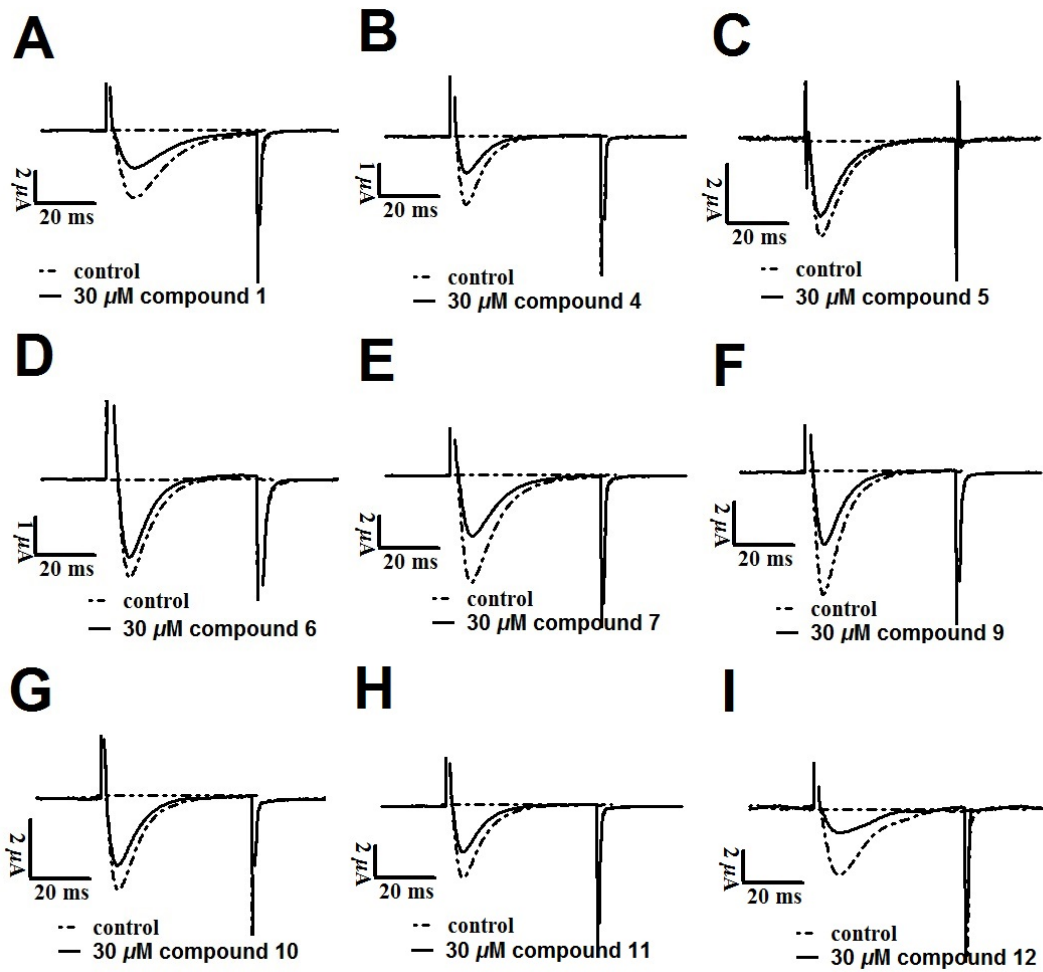

**Figure S36.** Inhibitory effects of compounds **1**, **4**, **5**, **6**, **7**, **9**, **10**, **11**, and **12** on  $Ca_v.3.1$  at 30  $\mu\text{M}$ . Representative peak current of  $Ca_v.3.1$  were evoked from a holding potential (HP) of -80 mV by 50 ms depolarization to -10 mV at 3 s intervals in the absence or presence of the indicated compounds.



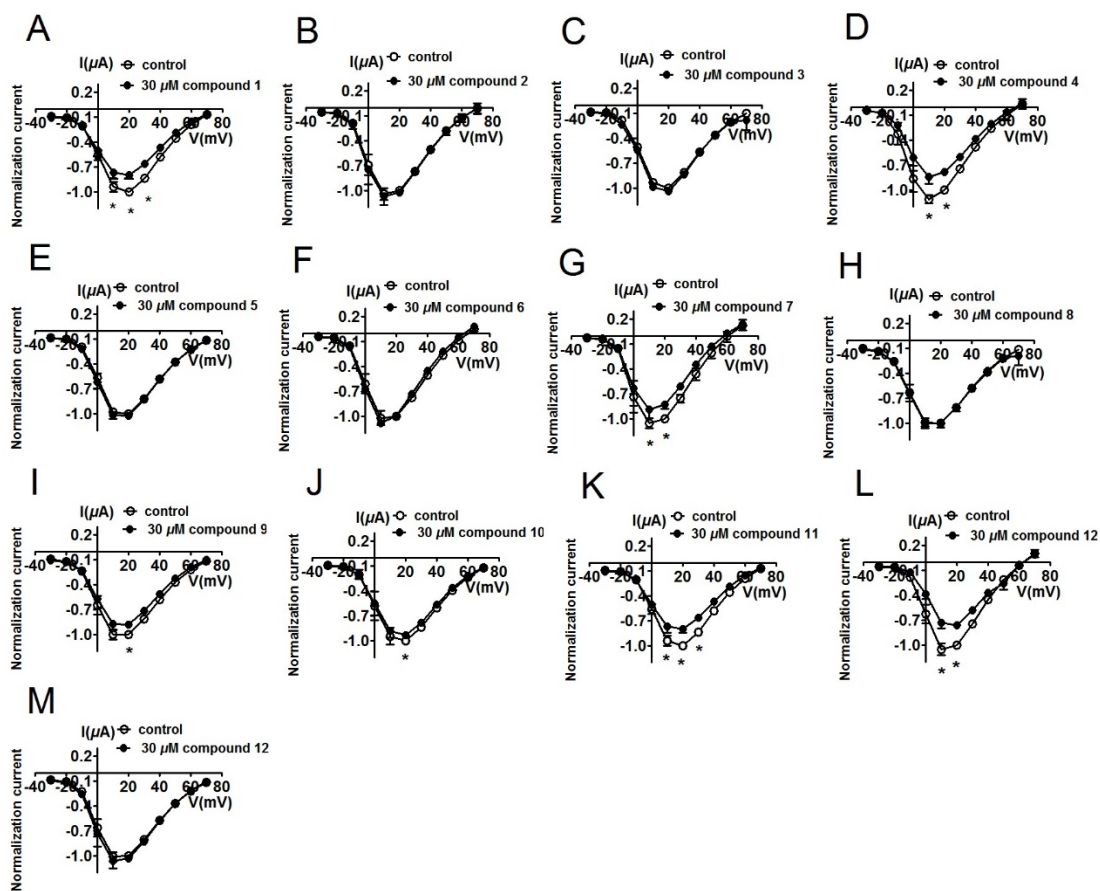

**Figure S37.** Normalized current-voltage (I-V) curves of  $Ca_v.1.2$  in the absence or presence of compounds **1-13**.  $Ca_v.1.2$  Currents were evoked from a holding potential (HP) of  $-80$  mV by  $50$  ms depolarization from  $-30$  mV to  $+70$  mV at  $3$  s intervals. All the data were analyzed with two-tailed student T test and represented as mean  $\pm$  SEM ( $n=3$ ). \* $P<0.05$ , compared with the absence of the indicated compounds.

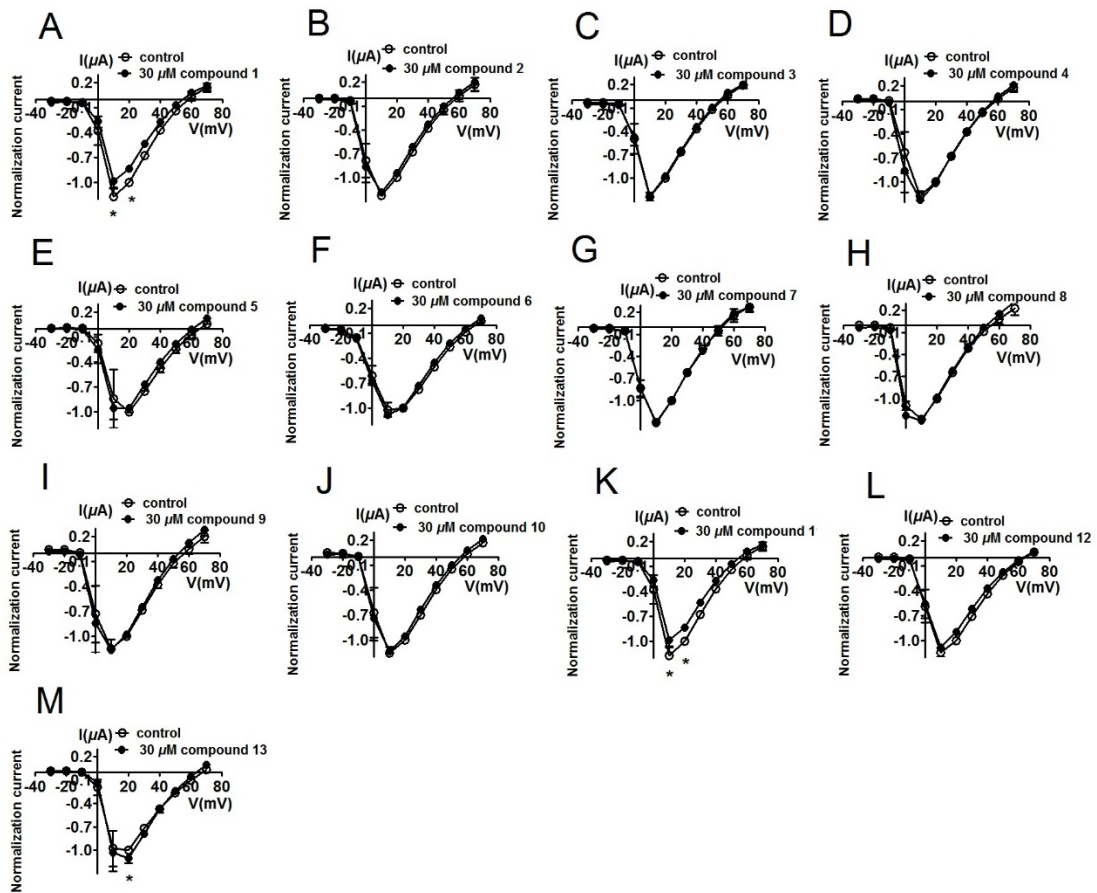

**Figure S38.** Normalized current-voltage (I-V) curves of  $Ca_v2.1$  in the absence or presence of compounds **1-13**.  $Ca_v2.1$  currents were evoked from a holding potential (HP) of  $-80$  mV by  $50$  ms depolarization from  $-30$  mV to  $+70$  mV at  $3$  s intervals. All the data were analyzed with tow-tailed student T test and represented as mean  $\pm$  SEM ( $n=3$ ).  $*P<0.05$ , compared with the absence of the indicated compounds.

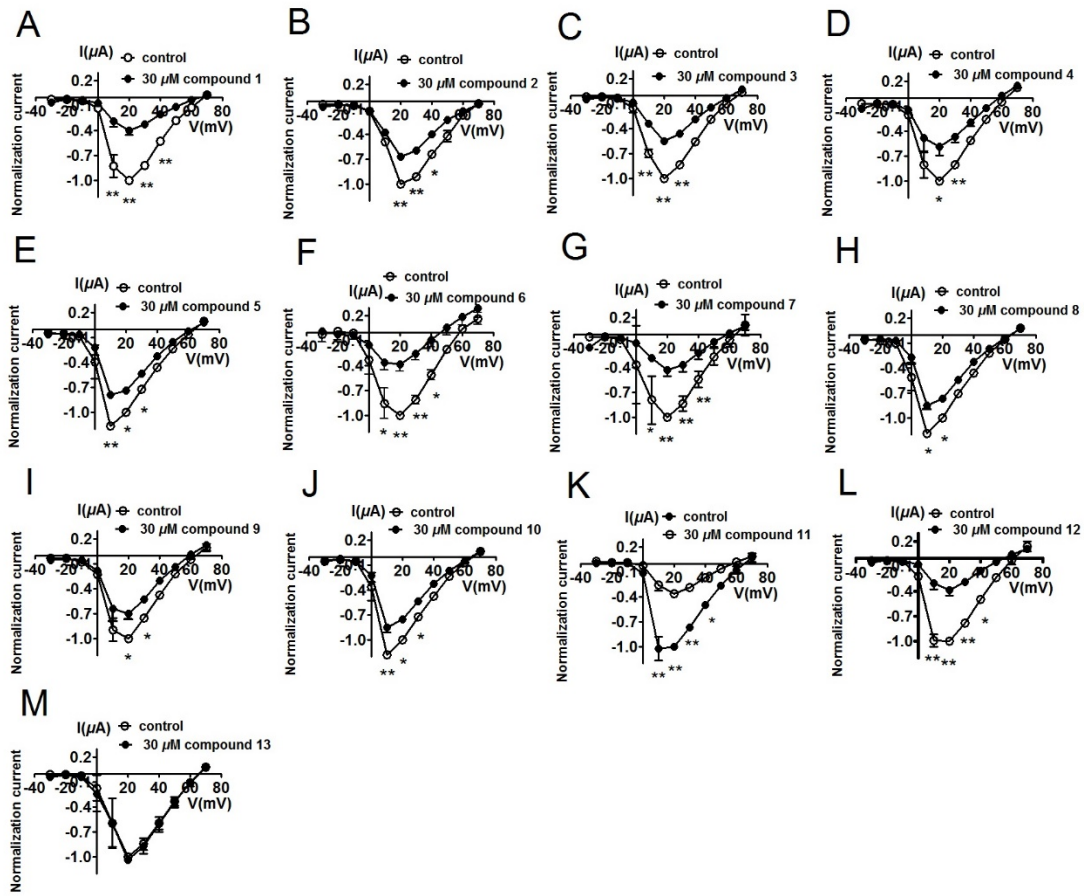

**Figure S39.** Normalized current-voltage ( $I$ - $V$ ) curves of  $Ca_v.2$  in the absence or presence of compounds **1-13**.  $Ca_v.2$  currents were evoked from a holding potential (HP) of  $-80$  mV by  $50$  ms depolarization from  $-30$  mV to  $+70$  mV at  $3$  s intervals. All the data were analyzed with tow-tailed student T test and represented as mean  $\pm$  SEM ( $n=3$ ).  $**P<0.01$ ,  $*P<0.05$ , compared with the absence of the indicated compounds.

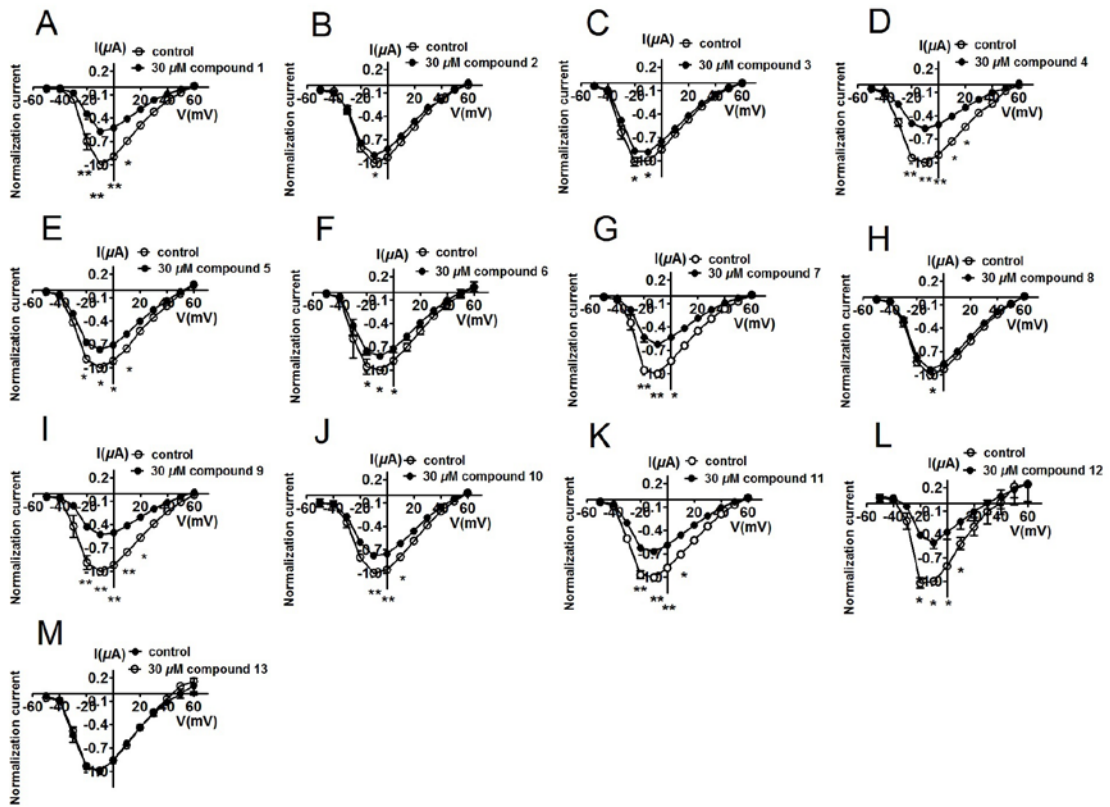

**Figure S40.** Normalized current-voltage (I-V) curves of  $Ca_v3.1$  in the absence or presence of compounds **1-13**.  $Ca_v3.1$  currents were evoked from a holding potential (HP) of  $-80$  mV by  $50$  ms depolarization from  $-50$  mV to  $+60$  mV at  $3$  s intervals. All the data were analyzed with tow-tailed student T test and represented as mean  $\pm$  SEM ( $n=3$ ).  $**P<0.01$ ,  $*P<0.05$ , compared with the absence of the indicated compounds.

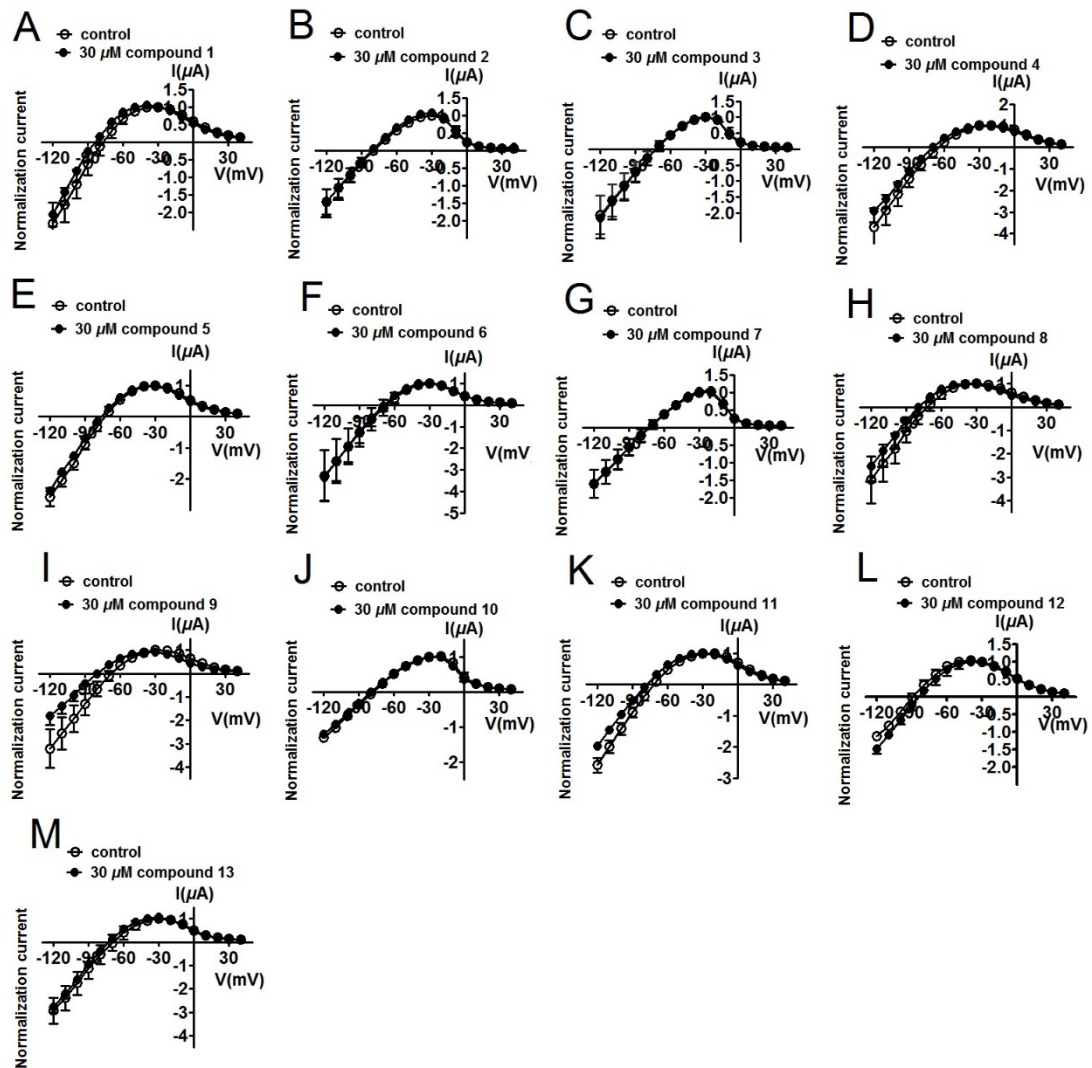

**Figure S41.** Normalized current-voltage (I-V) curves of KCNH2 in the absence or presence of compounds **1-13**. KCNH2 were pretreated by indicated compounds for 1 s and then currents were evoked from a holding potential (HP) of -80 mV by 3 s depolarization from -120 mV to +40 mV at 30 s intervals. All the data were analyzed with two-tailed student T test and represented as mean  $\pm$  SEM (n=3), compared with the absence of the indicated compounds.

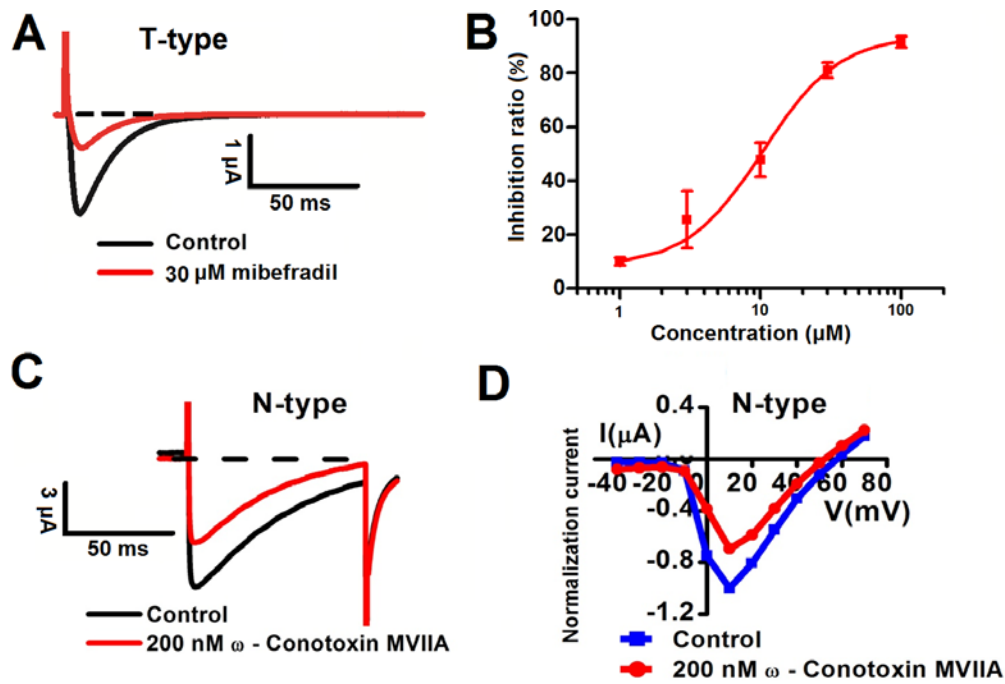

**Figure S42.** The inhibitory effects of Mibefradil (the commercial T-type calcium channel inhibitor) and  $\omega$ -Conotoxin MVIIA (the commercial N-type calcium channel inhibitor) on  $Ca_v3.1$  and  $Ca_v2.2$ , respectively. (A) Representative  $Ca_v3.1$  current trace evoked by 50-ms depolarizations to  $-10$  mV at 3-s intervals from a holding potential (HP) of  $-80$  mV in the absence and presence of mibefradil.  $Ca_v3.1$  was expressed in *Xenopus* oocytes; (B) Dose-response relationship of mibefradil inhibition of  $Ca_v3.1$ . Data points represent mean $\pm$ S.E.M. of three measurements at HP of  $-80$  mV. Solid curve represents a fit to the Hill equation with an  $IC_{50}$  value of  $10.4\mu$ M and a Hill coefficient of 1.6; (C) Representative  $Ca_v2.2$  current trace evoked by 50-ms depolarizations to  $+20$  mV at 3-s intervals from a holding potential (HP) of  $-80$  mV in the absence and presence of  $\omega$ -Conotoxin MVIIA.  $Ca_v2.2$  was expressed in *Xenopus* oocytes; (D) Normalized current-voltage (I-V) curves of  $Ca_v2.2$  in the absence or presence of the indicated concentrations of  $\omega$ -conotoxin MVIIA. Results were obtained in 3 cells.
